# Supplementary material for: miRNA Transcriptome of Hypertrophic Skeletal Muscle with Overexpressed Myostatin Propeptide
Source: Biomed Res Int. 2014 Jul 24;2014:328935. doi: 10.1155/2014/328935 (PMC4131533; doi:10.1155/2014/328935)
Supplement: Supplementary file 1 — Additional File 1: A Total of 461 mature know miRNAs were identified, their consensus sequence and homology miRNA in miRBase are mentioned in the list. These 461 miRNAs obtained in the sequencing data matched perfectly with 1908 known Mus musculus miRNAs in the miRBase. Mature read count and expression level of each miRNA is listed here in the file. Log2 fold change and P value was calculated for each identified known miRNA. Additional File 2: List of Identified IsomiRs of different miRNAs which were having heterogeneity at 5' and 3' end from their miRBase reference sequences. IsomiRs were selected which were having most abundant isoform or more than one abundant isoform. Six isomiRs i.e. mmu-miR-16a-2, mmu-miR-133a-1, mmu-miR-188b-2, mmu-miR-199a-2, mmu-miR-486 and mmu-miR-26b-5P were selected. Additional File 3: List of predicted Novel miRNAs. A total of 69 Novel miRNAs were identified out of which some were having high read count in control and in transgenic library. Two novel miRNAs i.e. NMmu-14 and NMmu-36 which were having more than 100 read counts in control and transgenic library were selected for validation. Additional File 4: After analysing miRseq data using miRDeep2 software a total of 57 differentially expressed miRNAs were identified. On the basis of each miRNA read count and expression level log2fold change and P value was calculated. Differentially expressed miRNAs were identified with satisfied criteria log2FoldChange ≥ 1 or ≤ -1 and P ≤ 0.05, Q value 0 .1. Additional File 5: Randomly 20 abundant miRNAs were selected and their targets were identified using mRDB online tool. A total of 4,413 targets were identified for 20 miRNAs. We found some of miRNAs targets, which are known to play important role in TGF-β signaling. [file 328935.f1.xls]

## Sheet: Additional File 1
mmu_miRNA	consensus mature sequence	example.miRBase.miRNA.with.the.same.seed.CN148	mature.read.count.CN148	mature.read.count.CN150	mature.read.count.TN126	mature.read.count.TN135	mature.read.count.TN329	CN148	CN150	TN126	TN135	TN329	Total	log2FC	p_value
mmu-miR-22-3p	aagcugccaguugaagaacugu	hsa-miR-22-3p	1637847	924589	755381	1123582	3994285	3.0529e+06	4.11752e+06	4.25636e+06	5.9107e+06	9.29048e+06	3.1826e+07	0.855238	0.2342
mmu-miR-133a-3p	uuugguccccuucaaccagcugu	hsa-miR-133a-3p	1143874	716877	1004715	1049011	2559079	2.13215e+06	3.19251e+06	5.66129e+06	5.51841e+06	5.95227e+06	2.67694e+07	1.10097	0.00570276
mmu-miR-486-3p	uccuguacugagcugccccgag	hsa-miR-486-5p	694107	288434	902799	1325315	1449572	1.2938e+06	1.2845e+06	5.08702e+06	6.97193e+06	3.37162e+06	2.20705e+07	1.99634	0.0639682
mmu-miR-143-3p	ugagaugaagcacuguagcu	hsa-miR-143-3p	496985	195585	849193	676631	929146	926366	871009	4.78497e+06	3.55947e+06	2.16114e+06	1.58964e+07	1.96223	0.0763617
mmu-miR-378a-3p	acuggacuuggagucagaagg	hsa-miR-378a-3p	427775	201482	356711	417747	963117	797360	897270	2.00997e+06	2.19759e+06	2.24016e+06	9.9854e+06	2.21866	0.096746
mmu-miR-10b-5p	uacccuguagaaccgaauuugu	hsa-miR-10a-5p	326382	192684	645680	909894	779855	608367	858090	3.63823e+06	4.78657e+06	1.8139e+06	1.47701e+07	1.34286	0.00093823
mmu-miR-26a-5p	uucaaguaauccaggauaggcu	hsa-miR-26a-5p	265020	151950	184254	263216	580434	493990	676687	1.03822e+06	1.38467e+06	1.35006e+06	6.24554e+06	1.10339	0.0236686
mmu-miR-30a-5p	uguaaacauccucgacuggaagcu	hsa-miR-30a-5p	261283	140089	300795	1e-10	612340	487024	623866	1.6949e+06	5.26e-10	1.42427e+06	4.23005e+06	1.25834	0.000296327
mmu-miR-27b-3p	uucacaguggcuaaguucug	hsa-miR-27a-3p	190947	85527	151307	174403	375692	355920	380882	852573	917461	873838	4.27665e+06	0.904482	0.528078
mmu-miR-181a-5p	aacauucaacgcugucggugagu	hsa-miR-181a-5p	123076	85492	1e-10	1e-10	251247	229410	380726	5.63e-10	5.26e-10	584386	1.19452e+06	2.19785	0.0939672
mmu-miR-10a-5p	uacccuguagauccgaauuugu	hsa-miR-10a-5p	106751	35960	179584	198961	177518	198981	160143	1.01191e+06	1.04665e+06	412897	3.78861e+06	1.75549	0.0502856
mmu-miR-126a-5p	cauuauuacuuuugguacgcg	hsa-miR-126-5p	104630	34633	98023	148161	187931	195027	154233	552332	779413	437117	2.87832e+06	0.947653	0.0584856
mmu-let-7f-5p	ugagguaguagauuguauaguu	hsa-let-7a-5p	76751	57966	62527	66748	196595	143062	258143	352322	351133	457269	1.93684e+06	1.18528	0.00683791
mmu-miR-30d-5p	uguaaacauccccgacuggaagcu	hsa-miR-30a-5p	71324	36990	53116	69360	151007	132946	164729	299294	364874	351234	1.62455e+06	1.62715	0.0117258
mmu-miR-30e-5p	uguaaacauccuugacuggaagcu	hsa-miR-30a-5p	46295	22850	49869	64934	106949	86292.5	101759	280998	341591	248757	1.39697e+06	1.70786	0.057734
mmu-miR-191-5p	caacggaaucccaaaagcagcug	hsa-miR-191-5p	43014	20310	53825	66552	78546	80176.9	90447.6	303289	350102	182694	1.27736e+06	-0.647171	0.697603
mmu-miR-30c-5p	uguaaacauccuacacucucagcu	hsa-miR-30a-5p	37487	18170	25658	36686	79218	69874.7	80917.4	144576	192990	184257	832022	2.84164	0.0867084
mmu-miR-16-5p	uagcagcacguaaauauuggcg	hsa-miR-15a-5p	28759	13306	30684	29020	59154	53605.9	59256.3	172896	152662	137589	722299	2.41088	0.103214
mmu-miR-101a-3p	uacaguacugugauaacugaag	hsa-miR-101-3p	27883	12254	32687	43902	70651	51973.1	54571.4	184182	230950	164330	873325	2.87005	0.169187
mmu-let-7i-5p	ugagguaguaguuugugcuguu	hsa-let-7a-5p	27804	25012	16454	15724	76035	51825.9	111387	92713.7	82717.4	176853	611060	1.8583	0.0119328
mmu-miR-100-5p	aacccguagauccgaacuugu	hsa-miR-99a-5p	26629	8764	58392	50326	48803	49635.7	39029.2	329023	264744	113513	1.0712e+06	1.20603	0.0153045
mmu-miR-1a-1-3p	uggaauguaaagaaguauguau	hsa-miR-1	25824	4872	59300	56369	51677	48135.2	21696.7	334139	296534	120198	1.08367e+06	48.438	0.495025
mmu-miR-21a-5p	uagcuuaucagacugauguuga	hsa-miR-21-5p	25762	13328	31527	22657	51740	48019.6	59354.3	177646	119189	120344	666006	1.45194	0.00525546
mmu-let-7a-5p	ugagguaguagguuguauaguu	hsa-let-7a-5p	22645	14527	19001	18235	51268	42209.6	64693.8	107065	95926.7	119246	544697	0.906998	0.535603
mmu-miR-125a-5p	ucccugagacccuuuaaccugu	hsa-miR-125b-5p	22035	10736	16909	13863	41410	41072.6	47811.2	95277.5	72927.5	96317.3	444394	1.37306	0.0431269
mmu-miR-127-3p	ucggauccgucugagcuuggcu	hsa-miR-127-3p	20888	19550	28964	36344	1e-10	38934.6	87063	163204	191191	2.33e-10	666864	0.525021	0.479489
mmu-miR-125b-5p	ucccugagacccuaacuugugag	hsa-miR-125b-5p	18733	10574	18525	12921	36365	34917.8	47089.7	104383	67972	84582.9	416978	1.00686	0.0208742
mmu-miR-26b-5p	uucaaguaauucaggauagguu	hsa-miR-26a-5p	18498	7630	20838	26573	39953	34479.7	33979.1	117416	139789	92928.4	541237	1.76964	0.0180011
mmu-miR-378d-5p	acuggccuuggagucagaaggu	hsa-miR-3176	17270	7758	14457	17438	37485	32190.8	34549.1	81461.2	91734	87188	418756	1.65602	0.270784
mmu-miR-133b-3p	uuugguccccuucaaccagcu	hsa-miR-133a-3p	17250	7097	66977	46252	33747	32153.5	31605.4	377397	243312	78493.6	942814	0.988435	0.0231047
mmu-miR-92a-1-3p	uauugcacuugucccggccugu	hsa-miR-25-3p	16783	12552	14209	10021	40799	31283	55898.5	80063.8	52716.3	94896.2	365077	1.37905	0.000865124
mmu-miR-148a-3p	ucagugcacuacagaacuuugu	hsa-miR-148a-3p	16589	9216	35176	17861	20645	30921.4	41042.1	198207	93959.3	48019.1	500583	1.06263	0.0526124
mmu-let-7g-5p	ugagguaguaguuuguacaguu	hsa-let-7a-5p	14592	7979	11133	10874	33041	27199.1	35533.3	62731.4	57203.6	76851.5	324267	1.26468	0.0414312
mmu-miR-151-5p	ucgaggagcucacagucuagu	hsa-miR-151a-5p	13777	6426	9885	11847	27385	25679.9	28617.2	55699.2	62322.1	63696	296425	0.799928	0.177414
mmu-miR-29a-3p	uagcaccaucugaaaucgguu	hsa-miR-29a-3p	12690	6816	11363	13280	29940	23653.8	30354	64027.4	69860.5	69638.8	325025	1.32901	0.0013615
mmu-miR-192-5p	cugaccuaugaauugacagcc	hsa-miR-192-5p	12290	14866	9367	10218	18213	22908.2	66203.5	52780.5	53752.6	42362.4	304819	1.06439	0.0247608
mmu-miR-181b-5p	aacauucauugcugucgguggg	hsa-miR-181a-5p	10887	9956	4322	5255	27194	20293.1	44337.6	24353.3	27644.4	63251.7	209660	0.155651	0.782375
mmu-miR-199a-3p	acaguagucugcacauugguu	hsa-miR-199a-3p	9547	9097	14307	13552	25039	17795.3	40512.1	80616	71291.4	58239.3	374624	1.15778	0.00217993
mmu-miR-27a-3p	uucacaguggcuaaguuccg	hsa-miR-27a-3p	9460	4944	9963	9379	17929	17633.2	4.45e-10	5.63e-10	49339	41701.8	173519	1.86159	0.0807637
mmu-miR-149-5p	ucuggcuccgugucuucacuc	hsa-miR-149-5p	8128	3900	3202	4247	13865	15150.4	17368.1	5.63e-10	5.26e-10	32249.2	64767.6	3.21021	0.455332
mmu-let-7d-5p	agagguaguagguugcauaguu	hsa-let-7a-5p	8117	7395	3993	5314	20767	15129.9	32932.5	22499.5	27954.7	48302.9	173607	1.19845	0.0227014
mmu-miR-99a-5p	aacccguagauccgaucuugu	hsa-miR-99a-5p	7919	3925	13295	12766	14478	14760.8	17479.4	74913.6	67156.6	33675	277733	0.249506	0.762096
mmu-miR-186-5p	caaagaauucuccuuuugggcu	hsa-miR-186-5p	7600	5045	6868	9321	16498	14166.2	22467.2	38699.3	49033.9	38373.4	210900	2.38061	0.264575
mmu-miR-30b-5p	uguaaacauccuacacucagcu	hsa-miR-30a-5p	6644	2208	6869	9385	11859	12384.2	9833	38704.9	49370.6	27583.4	179289	1.79516	0.0438363
mmu-miR-25-3p	cauugcacuugucucggucuga	hsa-miR-25-3p	5971	3472	6054	4441	11819	11129.8	15462	34112.6	23362.2	27490.3	136610	0.454013	0.516296
mmu-miR-434-3p	uuugaaccaucacucgacuccu	rno-miR-434-3p	5064	3648	2317	3987	13238	9439.15	16245.8	13055.7	20973.9	30790.8	109950	1.78326	0.377864
mmu-miR-23b-3p	aucacauugccagggauuaccacg	hsa-miR-23a-3p	4899	2036	5410	5394	9048	9131.59	9067.02	30483.9	28375.6	21045.1	136765	0.866066	0.0864389
mmu-miR-103-5p	agcagcauuguacagggcuauga	hsa-miR-103a-3p	4648	2498	4780	4388	8923	8663.74	11124.5	26934	23083.4	20754.4	111411	1.54949	0.0177193
mmu-miR-411-5p	uaguagaccguauagcguacg	hsa-miR-411-5p	4543	4665	4652	4772	12311	8468.02	20774.9	26212.7	25103.5	28634.7	137244	1.09093	0.0408756
mmu-miR-142-5p	cccauaaaguagaaagcacu	-	4306	1739	33875	2272	6924	8026.26	7744.38	190876	11952	16104.8	252825	1.52035	0.0789238
mmu-miR-146b-5p	ugagaacugaauuccauaggcugu	hsa-miR-146a-5p	4267	1981	14825	4954	9220	7953.56	8822.09	83534.8	26060.9	21445.2	183244	1.25357	0.0119638
mmu-miR-140-3p	accacaggguagaaccacggac	-	3919	1859	5349	4104	6589	7304.9	8278.78	30140.1	21589.4	15325.6	111657	0.750562	0.30444
mmu-miR-23a-3p	aucacauugccagggauuucc	hsa-miR-23a-3p	3645	1633	4181	4146	5667	6794.17	7272.32	23558.8	21810.4	13181.1	105263	1.66908	0.0849553
mmu-miR-181c-5p	aacauucaaccugucggugagu	hsa-miR-181a-5p	3141	1686	5047	4204	5671	5854.73	7508.35	28438.4	22115.5	13190.4	108802	1.47245	0.057136
mmu-miR-24-1-3p	uggcucaguucagcaggaacagg	hsa-miR-24-3p	3104	1438	8210	7320	4572	1.86e-10	4.45e-10	46261.1	38507.5	2.33e-10	84768.5	1.71845	0.0460698
mmu-miR-29c-3p	uagcaccauuugaaaucgguua	hsa-miR-29a-3p	3086	1731	3000	5514	8829	5752.21	7708.75	16904.2	29006.9	20535.8	96473.8	46.3479	0.223479
mmu-miR-322-5p	cagcagcaauucauguuuuggag	hsa-miR-15a-5p	2836	1059	2300	3189	5969	5286.22	4716.1	12959.9	16776	2.33e-10	57071	0.874555	0.149331
mmu-miR-92a-2-3p	uauugcacuugucccggccug	hsa-miR-25-3p	2696	1878	2648	1137	6337	5025.27	8363.39	5.63e-10	5.26e-10	14739.5	28128.2	-0.596956	0.718392
mmu-miR-128-3p	ucacagugaaccggucucuuu	hsa-miR-216a-3p	2680	2091	1670	2561	7079	4995.44	9311.96	9409.99	13472.4	16465.4	66089.5	1.65506	0.0240132
mmu-miR-93-5p	caaagugcuguucgugcaggu	hsa-miR-17-5p	2197	1091	3422	2072	4205	4095.14	4858.61	19282	10899.9	9780.59	59168.8	3.16383	0.284985
mmu-miR-182-5p	uuuggcaaugguagaacucacacc	hsa-miR-182-5p	2141	1e-10	5511	264	541	3990.76	4.45e-10	31053	1388.79	1258.34	41099.6	1.57312	0.10705
mmu-miR-98-5p	ugagguaguaaguuguauuguu	hsa-let-7a-5p	2107	1263	1673	1744	4961	3927.39	5624.58	9426.89	9174.46	11539	50207.7	1.51457	0.0363443
mmu-miR-351-5p	ucccugaggagcccuuugagccu	hsa-miR-125b-5p	2015	1349	1277	1414	3017	3755.9	6007.57	7195.54	7438.46	7017.37	41299.3	2.53198	0.118127
mmu-miR-150-5p	ucucccaacccuuguaccagu	hsa-miR-150-5p	1970	677	7926	1220	3115	1.86e-10	4.45e-10	44660.8	5.26e-10	2.33e-10	44660.8	0.986907	0.508312
mmu-miR-148b-3p	ucagugcaucacagaacuuugucu	hsa-miR-148a-3p	1940	1130	2614	2994	4461	3616.1	5032.29	14729.2	15750.2	10376	60956.7	0.122259	0.959156
mmu-miR-423-3p	agcucggucugaggccccucagu	hsa-miR-423-3p	1764	1e-10	645	590	1e-10	3288.05	4.45e-10	3634.4	3103.74	2.33e-10	13207.1	1.51498	0.00715712
mmu-miR-340-5p	uuauaaagcaaugagacugauu	hsa-miR-340-5p	1732	889	2418	2103	4046	3228.4	3959.03	13624.8	11063	9410.77	51586.6	1.6612	0.016823
mmu-miR-28a-5p	aaggagcucacagucuauugag	hsa-miR-28-5p	1729	1111	1e-10	1e-10	5064	3222.81	4947.67	5.63e-10	5.26e-10	11778.6	19949.1	1.07286	0.0197861
mmu-miR-107-3p	agcagcauuguacagggcuau	hsa-miR-103a-3p	1662	841	1337	1243	3259	3097.92	3745.27	7533.63	6538.9	7580.25	35225.8	45.4234	0.495025
mmu-miR-1839-5p	aagguagauagaacaggucuugu	hsa-miR-3927-3p	1598	805	727	749	3971	2978.63	3584.95	4096.44	5.26e-10	9236.32	19896.3	0.56403	0.0716231
mmu-miR-145a-5p	guccaguuuucccaggaaucccu	hsa-miR-145-5p	1559	1e-10	2811	4415	1e-10	2905.93	4.45e-10	15839.2	23225.5	2.33e-10	60613.4	1.45658	0.408769
mmu-miR-136-3p	caucaucgucucaaaugagucu	hsa-miR-136-3p	1482	1147	1937	2336	4530	2762.41	5107.99	10914.5	12288.7	10536.5	54526.4	2.49305	0.525023
mmu-miR-15a-5p	uagcagcacauaaugguuugu	hsa-miR-15a-5p	1471	676	1285	1332	3126	2741.9	3010.47	7240.62	7007.1	7270.9	33939.5	1.69661	0.0211332
mmu-miR-501-3p	aaugcacccgggcaaggauuug	hsa-miR-501-3p	1433	373	1195	849	1386	2671.07	4.45e-10	6733.49	5.26e-10	3223.76	22964	1.07685	0.00475329
mmu-miR-1843a-5p	uauggaggucucugucugacu	hsa-miR-4802-5p	1386	834	1073	1261	3713	1.86e-10	4.45e-10	6046.06	6633.6	2.33e-10	17810.3	1.3184	8.78598e-05
mmu-miR-146a-5p	ugagaacugaauuccauggguu	hsa-miR-146a-5p	1381	910	3256	681	2301	2574.14	4052.55	18346.7	3582.46	5352	41220.3	1.00857	0.0541044
mmu-miR-541-5p	aagggauucugauguugguca	rno-miR-541-5p	1307	939	1156	1e-10	3312	2436.21	4.45e-10	6513.74	5.26e-10	7703.53	25188.4	1.15855	0.0068839
mmu-miR-196b-5p	uagguaguuuccuguuguuggg	hsa-miR-196a-5p	1267	537	1317	1793	2690	2361.65	2391.45	7420.93	9432.23	6256.79	35854.7	-0.446286	0.800775
mmu-miR-206-3p	uggaauguaaggaagugugugg	hsa-miR-1	1216	188	632	799	1133	2266.59	837.23	3561.15	4203.21	2635.29	25942.2	-0.516784	0.813622
mmu-let-7e-3p	ugagguaggagguuguauaguu	hsa-let-7a-5p	1186	895	1102	990	3131	2210.67	3985.75	6209.47	5207.98	7282.53	32116.9	1.15946	0.094653
mmu-miR-338-3p	uccagcaucagugauuuuguu	hsa-miR-338-3p	1167	568	580	1089	1974	2175.25	2529.5	3268.14	5728.77	4591.41	24558.5	1.95997	0.354334
mmu-miR-195a-5p	uagcagcacagaaauauuggc	hsa-miR-15a-5p	1154	435	2925	2658	2151	2151.02	1937.21	16481.6	13982.6	5003.11	57295.8	0.945213	0.100521
mmu-miR-381-3p	uauacaagggcaagcucucugu	hsa-miR-381-3p	1149	1467	1883	2775	5146	2141.7	6533.07	10610.2	14598.1	11969.3	58852	2.75646	0.147537
mmu-miR-425-5p	aaugacacgaucacucccguug	hsa-miR-425-5p	1137	556	931	797	2384	2119.34	2476.06	5245.93	4192.68	5545.05	23092.9	1.12017	0.0159087
mmu-miR-130a-3p	cagugcaauguuaaaagggc	hsa-miR-130a-3p	1126	614	972	922	2518	2098.83	2734.36	5476.95	4850.26	5856.73	28662.7	1.31337	0.51582
mmu-miR-676-3p	ccguccugagguuguugagcu	-	1117	809	302	552	2761	2082.06	3602.76	1701.69	2903.84	6421.93	19652.2	2.28186	0.105626
mmu-miR-320-3p	aaaagcuggguugagagggcga	hsa-miR-320a	1062	498	729	781	2029	1979.54	2217.77	4107.71	4108.52	4719.34	22237.2	1.03885	0.0041176
mmu-miR-204-5p	uucccuuugucauccuaugccu	hsa-miR-204-5p	1013	734	1125	1407	1e-10	1888.2	4.45e-10	6339.06	7401.64	2.33e-10	19274.2	1.65769	0.0142402
mmu-miR-5099-3p	gcuuagaucgauguggugcuc	-	815	556	224	227	3436	1519.14	2476.06	5.63e-10	5.26e-10	7991.94	11987.1	1.15009	0.00723963
mmu-miR-497-5p	cagcagcacacugugguuugu	hsa-miR-15a-5p	789	474	765	702	1685	1470.67	2110.89	4310.56	3692.93	3919.22	21397.2	-0.0572895	0.977122
mmu-miR-301a-3p	cagugcaauaguauugucaaagc	hsa-miR-130a-3p	717	376	997	887	1705	1336.47	1674.46	5617.82	4666.14	3965.73	22176.5	0.43746	0.75881
mmu-miR-7068-3p	ucacccuggacugacucucagg	hsa-miR-3620-3p	678	283	653	694	1366	1263.77	1260.3	3679.47	3650.84	3177.24	16821.5	0.370952	0.692701
mmu-miR-203-3p	ugaaauguuuaggaccacuaga	-	654	186	818	336	619	1219.04	4.45e-10	5.63e-10	5.26e-10	1439.76	4459.55	2.27841	0.320855
mmu-miR-365-3p	uaaugccccuaaaaauccuuau	hsa-miR-365a-3p	581	246	798	1532	1434	1082.97	1095.52	4496.51	8059.21	3335.4	22626.3	2.05345	0.118476
mmu-miR-152-3p	ucagugcaugacagaacuugg	hsa-miR-148a-3p	580	251	772	820	1e-10	1.86e-10	4.45e-10	5.63e-10	4313.68	2.33e-10	10246.1	1.25616	0.0223047
mmu-miR-194-5p	uguaacagcaacuccaugugga	hsa-miR-194-5p	540	530	348	403	1060	1006.54	2360.28	1960.88	2120.01	2465.5	11884.8	43.6069	0.220232
mmu-miR-361-5p	uuaucagaaucuccagggguac	hsa-miR-361-5p	533	281	609	841	1120	993.497	1251.39	3431.55	4424.15	2605.06	16070.6	1.47264	0.00176607
mmu-miR-19b-1-3p	ugugcaaauccaugcaaaacug	hsa-miR-19a-3p	515	255	1123	849	969	959.945	1135.6	6327.79	4466.23	2253.84	19253.2	7.48744	0.00646854
mmu-miR-671-3p	uccgguucucagggcuccacc	hsa-miR-671-3p	512	452	170	197	1300	954.353	2012.91	957.903	1036.33	3023.73	8979.81	1.63531	0.0409806
mmu-miR-410-3p	aauauaacacagauggccugu	hsa-miR-410-3p	500	511	698	738	1581	931.986	2275.66	3933.04	3882.31	3677.32	18972.2	-3.5839	0.277164
mmu-miR-221-3p	agcuacauugucugcuggguuu	hsa-miR-221-3p	486	201	679	545	817	905.89	895.124	3825.98	2867.02	1900.3	13820.6	1.66944	0.0715473
mmu-miR-193b-3p	aacuggcccacaaagucccgcu	hsa-miR-193a-3p	483	169	1423	1310	793	900.298	752.616	8018.21	6891.36	1844.47	23682.2	0.450158	0.773103
mmu-miR-181d-5p	aacauucauuguugucggugggu	hsa-miR-181a-5p	476	362	579	358	892	1.86e-10	4.45e-10	3262.5	1883.29	2.33e-10	8580.8	2.25885	0.0894568
mmu-miR-872-5p	aagguuacuuguuaguucagg	rno-miR-872-5p	423	250	308	340	1248	788.46	1113.34	1735.49	1788.6	2902.78	9927.88	0.415316	0.859481
mmu-miR-215-5p	augaccuaugauuugacagacc	hsa-miR-192-5p	413	44	54	78	1771	769.82	195.947	304.275	410.325	4119.25	6167.65	0.374352	0.423762
mmu-miR-139-5p	ucuacagugcacgugucuccagu	hsa-miR-139-5p	392	89	652	566	619	730.677	396.348	3673.84	2977.49	1439.76	12429.7	-2.70713	0.298279
mmu-miR-421-3p	aucaacagacauuaauugggcgc	hsa-miR-421	383	196	182	196	747	713.901	872.857	1025.52	1031.07	1737.48	6612	42.0514	0.495025
mmu-miR-222-3p	agcuacaucuggcuacugggucuc	hsa-miR-221-3p	351	365	196	144	679	654.254	1625.47	1104.41	757.524	1579.32	6873.28	42.7046	0.220496
mmu-miR-300-3p	uaugcaagggcaagcucucuuc	rno-miR-300-3p	337	1e-10	395	415	1025	628.158	4.45e-10	2225.72	2183.14	2384.09	10054.3	2.84988	0.00423656
mmu-miR-106b-3p	ccgcacuguggguacuugcu	hsa-miR-106b-3p	332	206	1e-10	1e-10	763	618.838	917.39	5.63e-10	5.26e-10	1774.7	3310.92	1.17179	0.0998903
mmu-miR-132-3p	uaacagucuacagccauggucg	hsa-miR-212-3p	327	189	111	137	390	609.519	841.683	625.454	720.7	907.118	5163.48	0.364593	0.884613
mmu-miR-674-3p	cacagcucccaucucagaac	rno-miR-674-3p	319	261	129	82	773	594.607	1162.32	726.879	431.368	1797.95	5427.3	4.54432	0.492589
mmu-miR-122-5p	uggagugugacaaugguguuugu	hsa-miR-122-5p	290	522	18	42	130	540.552	2324.65	101.425	220.944	302.373	4388.13	2.21387	0.12497
mmu-miR-20a-5p	uaaagugcuuauagugcagguag	hsa-miR-17-5p	260	88	464	498	372	484.632	391.895	2614.51	2619.77	865.251	9512.89	2.29757	0.00637102
mmu-miR-652-3p	aauggcgccacuaggguugugc	hsa-miR-652-3p	255	64	352	421	375	475.313	4.45e-10	1983.42	2214.71	872.229	7749.51	0.482048	0.505054
mmu-miR-3068	gugaauugcaguacuccaaca	-	254	125	291	354	635	473.449	556.669	1639.7	1862.25	1476.97	7301.55	0.173005	0.856145
mmu-miR-3061-3p	cuaccuuugauaguccacugcc	-	247	166	98	146	672	460.401	739.256	552.203	768.045	1563.03	4586.8	3.91057	0.5122
mmu-miR-92b-3p	uauugcacucgucccggccucc	hsa-miR-25-3p	245	2754	85	85	286	456.673	12264.5	478.951	447.15	665.22	14978.5	1.93055	0.291152
mmu-miR-155-5p	uuaaugcuaauugugauaggggu	hsa-miR-155-5p	236	89	476	189	390	439.897	396.348	2682.13	994.25	907.118	6366.12	42.3059	0.254624
mmu-miR-214-3p	acagcaggcacagacaggcagu	hsa-miR-214-3p	223	1e-10	415	283	359	415.666	4.45e-10	2338.41	1488.74	835.014	8508.46	2.90254	0.10405
mmu-miR-17-5p	caaagugcuuacagugcagguag	hsa-miR-17-5p	222	97	367	344	382	413.802	431.975	2067.94	1809.64	888.511	7066.49	2.83018	0.0819528
mmu-miR-450a-5p	uuuugcgauguguuccuaau	hsa-miR-450a-5p	217	156	257	247	530	1.86e-10	694.723	5.63e-10	5.26e-10	1232.75	1927.47	1.68806	0.00444797
mmu-miR-29b-1-3p	uagcaccauuugaaaucaguguu	hsa-miR-29a-3p	207	122	449	463	811	385.842	543.309	2529.99	2435.65	1886.34	9244.52	1.9095	0.0859846
mmu-miR-342-3p	ucucacacagaaaucgcacccgu	hsa-miR-342-3p	207	142	635	305	275	385.842	632.376	3578.05	1604.48	639.635	8715.62	1.33567	0.0531519
mmu-miR-9-5p	ucuuugguuaucuagcuguauga	hsa-miR-9-5p	202	1658	66	105	369	376.522	7383.66	371.892	552.361	858.273	11093.7	5.63042	0.503088
mmu-miR-1198-5p	uauguguuccuggcuggcuugg	-	190	125	120	130	457	354.155	556.669	676.167	683.876	1062.96	3964.74	0.00910726	0.988828
mmu-miR-1249-3p	acgcccuucccccccuucuuca	hsa-miR-1249	186	57	156	222	254	346.699	253.841	879.017	1167.85	590.79	4175.81	42.3844	0.274094
mmu-miR-1943-5p	agggaggaucugggcaccugga	hsa-miR-7106-5p	186	127	89	177	323	346.699	565.576	501.49	931.123	751.28	3775.28	0.672703	0.226772
mmu-miR-345-3p	ccugaacuaggggucuggaga	hsa-miR-4539	181	84	1e-10	1e-10	440	337.379	4.45e-10	5.63e-10	5.26e-10	1023.42	1360.79	1.86949	0.233584
mmu-miR-574-3p	cacgcucaugcacacacccaca	hsa-miR-574-3p	155	1e-10	257	231	285	288.916	4.45e-10	1448.12	1215.19	662.894	6112.52	4.09472	0.455654
mmu-miR-15b-5p	uagcagcacaucaugguuuaca	hsa-miR-15a-5p	150	66	511	156	197	279.596	293.921	2879.34	820.651	458.211	5721.92	1.73846	0.539334
mmu-miR-34c-5p	aggcaguguaguuagcugauugc	hsa-miR-34a-5p	144	69	134	59	172	268.412	307.281	755.053	310.374	400.062	2755.35	2.9402	0.05676
mmu-miR-455-3p	gcaguccacgggcauauacacu	hsa-miR-455-3p	143	1e-10	1e-10	52	1e-10	266.548	4.45e-10	5.63e-10	273.55	2.33e-10	1144.73	2.27309	0.340868
mmu-miR-341-3p	ucggucgaucggucggucggu	rno-miR-341	135	209	255	324	574	251.636	930.75	1436.85	1704.43	1335.09	7052.04	42.1103	0.298065
mmu-miR-138-5p	agcugguguugugaaucaggccg	hsa-miR-138-5p	133	115	62	93	170	247.908	512.135	349.353	489.234	395.41	2826.51	4.44829	0.0405082
mmu-miR-374b-5p	auauaauacaaccugcuaagu	hsa-miR-374a-5p	127	79	277	128	336	236.724	351.815	1560.82	673.355	781.517	4327.16	0.165724	0.864606
mmu-miR-335-3p	uuuuucauuauugcuccugacc	hsa-miR-335-3p	125	99	229	136	246	232.996	440.882	1290.35	715.439	572.182	4864.2	0.0498109	0.864698
mmu-miR-190a-3p	ugauauguuugauauauuagguug	hsa-miR-190a-5p	120	33	191	233	1e-10	223.677	4.45e-10	1076.23	1225.72	2.33e-10	2525.62	1.35072	0.173361
mmu-miR-210-3p	cugugcgugugacagcggcuga	hsa-miR-210-3p	117	58	132	107	206	218.085	258.294	743.783	562.882	479.144	3085.89	0.680127	0.443299
mmu-miR-193a-3p	aacuggccuacaaagucccagu	hsa-miR-193a-3p	109	41	163	260	257	203.173	182.587	918.46	1367.75	597.768	4238.03	3.51923	0.0360768
mmu-miR-183-5p	uauggcacugguagaauucacu	hsa-miR-183-5p	106	16	810	68	61	197.581	4.45e-10	4564.13	357.72	141.883	6190.16	-0.344877	0.876776
mmu-miR-673-5p	cucacagcucugguccuugga	rno-miR-673-5p	105	139	97	100	377	195.717	619.016	546.568	526.058	876.881	3303.15	-2.78227	0.164716
mmu-miR-653-5p	uugaaacaaucucuacugaacc	rno-miR-653-5p	104	31	106	121	204	193.853	138.054	597.281	636.531	474.493	2675.51	1.77232	0.145382
mmu-miR-185-5p	uggagagaaaggcaguuccuga	hsa-miR-185-5p	101	1e-10	141	162	129	188.261	4.45e-10	794.496	852.214	300.047	3063.87	2.31732	0.0760386
mmu-miR-331-3p	gccccugggccuauccuaga	hsa-miR-331-3p	100	25	291	426	110	186.397	4.45e-10	1639.7	5.26e-10	2.33e-10	3644.38	1.54996	0.0764774
mmu-miR-409-5p	agguuacccgagcaacuuugcau	hsa-miR-409-5p	98	1e-10	237	216	288	182.669	4.45e-10	1335.43	1136.29	669.872	4472.18	0.826588	0.147245
mmu-miR-31-5p	aggcaagaugcuggcauagcug	hsa-miR-31-5p	87	80	73	8	35	162.165	356.268	411.335	42.0847	81.408	1408.15	0.6744	0.228807
mmu-miR-298-5p	ggcagaggagggcuguucuucc	hsa-miR-2467-3p	82	48	33	16	87	152.846	4.45e-10	5.63e-10	5.26e-10	202.357	626.849	2.55202	0.568025
mmu-miR-1947-5p	aggacgagcuagcugagugcu	-	79	36	44	41	124	147.254	160.321	247.928	215.684	288.417	1326.87	-0.376784	0.833763
mmu-miR-141-3p	uaacacugucugguaaagaug	hsa-miR-141-3p	79	25	1554	21	79	147.254	111.334	8756.36	110.472	183.75	9558.91	0.673748	0.342346
mmu-miR-375-3p	uuuguucguucggcucgcguga	hsa-miR-375	75	65	30	12	134	139.798	289.468	169.042	63.127	311.676	1117.7	1.32143	0.0393847
mmu-miR-337-5p	cggcgucaugcaggaguugauu	rno-miR-337-5p	74	48	98	1e-10	208	137.934	213.761	552.203	5.26e-10	483.796	2066.81	2.7853	0.101006
mmu-miR-582-3p	aaccuguugaacaacugaaccc	rno-miR-582-3p	69	28	122	116	259	128.614	124.694	687.436	610.228	602.419	2674.78	-0.363997	0.869752
mmu-miR-32-5p	uauugcacauuacuaaguug	hsa-miR-25-3p	67	29	153	85	154	124.886	129.147	5.63e-10	447.15	358.195	1567.62	0.114223	0.797794
mmu-miR-200b-3p	uaauacugccugguaaugaugac	hsa-miR-200b-3p	67	55	1456	9	39	124.886	244.934	8204.16	47.3452	90.7118	8830.33	2.38692	0.126371
mmu-miR-379-5p	ugguagacuauggaacguagg	hsa-miR-379-5p	65	9	128	115	79	121.158	40.0802	721.245	604.967	183.75	2477.38	0.763049	0.336752
mmu-miR-19a-3p	ugugcaaaucuaugcaaaacug	hsa-miR-19a-3p	65	28	110	1e-10	121	121.158	124.694	619.82	5.26e-10	281.439	1646.59	1.77875	0.00892831
mmu-miR-1963-5p	ugggacgagaucaugaggccuuc	-	64	25	78	91	133	119.294	111.334	5.63e-10	478.713	309.351	1430.54	2.32214	0.000717937
mmu-miR-1199-5p	ucugagucccggucgcgcgg	rno-miR-1199-5p	59	22	8	10	85	109.974	97.9737	45.0778	52.6058	197.705	590.965	41.2944	0.495025
mmu-miR-1191b-5p	ucaggcuacagagcgagaaccu	-	58	33	37	49	103	108.11	146.961	208.485	257.769	239.572	1140.53	2.77841	0.285345
mmu-miR-350-5p	aaagugcaugcgcuuugggac	hsa-miR-519c-3p	58	34	64	1e-10	130	108.11	151.414	360.622	5.26e-10	302.373	922.519	2.64228	0.141358
mmu-miR-212-5p	accuuggcucuagacugcuuacu	hsa-miR-212-5p	57	1e-10	47	42	67	106.246	4.45e-10	264.832	220.944	155.838	1098.37	1.60902	0.0412228
mmu-miR-542-3p	ugugacagauugauaacugaaagg	hsa-miR-542-3p	56	40	98	74	151	104.382	178.134	552.203	389.283	351.218	2267.48	3.61915	0.52808
mmu-miR-7a-3p	caacaaaucacagucugccaua	hsa-miR-7-1-3p	54	23	110	106	116	100.654	102.427	619.82	557.622	269.809	2141.05	2.24822	0.0715475
mmu-miR-330-5p	ucucugggccugugucuuaggcu	hsa-miR-330-5p	54	86	45	40	113	100.654	382.988	253.563	210.423	262.832	1368.19	0.973665	0.507985
mmu-miR-218-3p	uugugcuugaucuaaccaugu	hsa-miR-218-5p	52	41	104	61	111	96.9265	182.587	586.011	320.896	258.18	1869.6	0.242409	0.921057
mmu-miR-224-5p	uaagucacuagugguuccguuu	hsa-miR-224-5p	51	54	34	26	156	95.0625	240.481	191.581	136.775	362.847	1250.2	-1.24235	0.4348
mmu-miR-205-3p	uccuucauuccaccggagucugu	hsa-miR-205-5p	50	28	1e-10	6	14	1.86e-10	124.694	5.63e-10	31.5635	32.5632	188.821	1.47448	0.159648
mmu-miR-205-5p	uccuucauuccaccggagucug	hsa-miR-205-5p	50	28	1229	6	14	93.1986	4.45e-10	6925.08	5.26e-10	2.33e-10	7018.27	-40.9034	0.272228
mmu-miR-615-3p	uccgagccugggucucccucu	hsa-miR-615-3p	49	27	31	31	71	91.3346	120.24	174.676	163.078	165.142	898.49	3.91505	0.136223
mmu-miR-499-5p	uuaagacuugcagugauguuu	hsa-miR-499a-5p	46	4	179	303	339	85.7427	17.8134	1008.62	1593.96	788.495	5475.01	1.89577	0.0484617
mmu-miR-369-3p	aauaauacaugguugaucuu	hsa-miR-369-3p	45	36	52	67	1e-10	83.8787	160.321	293.006	352.459	2.33e-10	889.664	3.19095	0.0313954
mmu-miR-376b-5p	guggauauuccuucuaugguu	rno-miR-376c-5p	44	26	57	94	124	82.0147	115.787	321.179	494.495	288.417	1731.27	1.28919	0.498761
mmu-miR-34a-5p	uggcagugucuuagcugguugu	hsa-miR-34a-5p	42	31	147	117	109	78.2868	138.054	828.304	615.488	253.528	2781.18	1.07963	0.481391
mmu-miR-1247-5p	acccgucccguucguccccggac	hsa-miR-1247-5p	40	23	13	1e-10	56	74.5588	102.427	73.2514	5.26e-10	130.253	538.22	1.18778	0.475043
mmu-miR-500-3p	aaugcaccugggcaaggguuc	hsa-miR-501-3p	39	14	59	44	43	72.6949	62.3469	332.449	231.466	100.016	1272.16	-0.540048	0.662132
mmu-miR-540-3p	aggucagaggucgauccugggc	hsa-miR-6801-5p	39	60	24	1e-10	198	72.6949	267.201	135.233	5.26e-10	460.537	935.666	0.00268926	0.996908
mmu-miR-299a-3p	uaugugggacgguaaaccgcu	hsa-miR-299-3p	37	59	1e-10	62	152	68.9669	262.748	5.63e-10	326.156	2.33e-10	1065.34	1.01599	0.731581
mmu-miR-124-3p	uaaggcacgcggugaaugcc	hsa-miR-124-3p	36	181	20	48	81	67.103	806.057	112.694	252.508	188.401	1891.19	0.70489	0.0391741
mmu-miR-130b-3p	cagugcaaugaugaaagggcauc	hsa-miR-130a-3p	36	36	53	11	1e-10	67.103	160.321	298.64	57.8664	2.33e-10	706.609	39.3261	0.495025
mmu-miR-362-3p	aacacaccuguucaaggauuc	hsa-miR-362-3p	35	18	86	64	119	1.86e-10	80.1603	484.586	336.677	276.787	1730.27	1.71266	0.175115
mmu-miR-433-3p	aucaugaugggcuccucggugu	hsa-miR-433-3p	33	9	24	16	64	61.511	40.0802	135.233	84.1693	148.86	640.729	0.457647	0.587001
mmu-miR-1933-3p	ccaggaccaucagugugacuau	-	33	18	13	17	66	61.511	80.1603	73.2514	89.4299	153.512	506.06	-5.46801	0.281379
mmu-miR-200a-3p	uaacacugucugguaacgaugu	hsa-miR-141-3p	33	12	453	5	13	1.86e-10	4.45e-10	2552.53	5.26e-10	2.33e-10	2600.73	-0.547551	0.802384
mmu-miR-134-5p	ugugacugguugaccagagggg	hsa-miR-134-5p	31	19	50	33	67	57.7831	84.6137	281.736	173.599	155.838	1029.6	0.883451	0.0196025
mmu-miR-466i-5p	acagcaggcacagacaggacu	hsa-miR-214-3p	30	20	1e-10	34	1e-10	55.9191	89.067	5.63e-10	178.86	2.33e-10	678.739	-0.243637	0.778488
mmu-miR-874-3p	cugcccuggcccgagggaccgacu	hsa-miR-874-3p	29	74	57	46	42	1.86e-10	4.45e-10	321.179	241.987	2.33e-10	782.236	2.00933	0.0664816
mmu-miR-485-5p	agaggcuggccgugaugaauuc	hsa-miR-485-5p	29	86	19	18	98	54.0552	382.988	107.06	94.6905	227.942	963.127	-0.609342	0.741354
mmu-miR-7224-3p	uccacugagaggaccacccaca	hsa-miR-181a-2-3p	29	17	1e-10	15	1e-10	54.0552	75.707	5.63e-10	78.9087	2.33e-10	296.299	1.5167	0.0832011
mmu-miR-1968-5p	ucugcagcuguuaaggauggug	hsa-miR-1184	29	26	30	27	90	54.0552	4.45e-10	5.63e-10	142.036	209.335	405.426	4.74339	0.169486
mmu-miR-324-5p	cgcauccccuagggcauuggugu	hsa-miR-324-5p	28	1e-10	96	100	49	52.1912	4.45e-10	540.933	526.058	113.971	1758.92	3.1422	0.0819031
mmu-miR-219a-3p	agaauuguggcuggacaucugu	hsa-miR-219a-2-3p	27	244	1e-10	7	1e-10	1.86e-10	1086.62	5.63e-10	36.8241	2.33e-10	1145.35	-0.609434	0.614223
mmu-miR-429-3p	uaauacugucugguaaugccg	hsa-miR-200b-3p	27	13	354	1e-10	14	50.3272	57.8936	1994.69	5.26e-10	2.33e-10	2190.54	39.8547	0.495025
mmu-miR-7019-3p	ucaccuuggccgccucucugcag	-	27	8	16	19	63	50.3272	4.45e-10	5.63e-10	5.26e-10	146.534	196.862	0.2247	0.890168
mmu-miR-329-5p	agagguuuucugggucucuguu	rno-miR-329-5p	27	15	1e-10	20	84	50.3272	66.8003	5.63e-10	5.26e-10	195.379	312.507	0.768166	0.574347
mmu-miR-196a-5p	uagguaguuucauguuguugggauu	hsa-miR-196a-5p	25	1e-10	14	15	51	46.5993	4.45e-10	78.8861	78.9087	118.623	366.831	0.664129	0.0132642
mmu-miR-483-3p	cacuccuccccucccgucuugu	rno-miR-483-3p	25	13	12	8	27	46.5993	57.8936	67.6167	42.0847	62.8005	390.911	0.817316	0.56288
mmu-miR-511-3p	aauguguagcaaaagacaggau	hsa-miR-511-3p	24	11	29	21	44	44.7353	48.9869	163.407	110.472	102.342	653.961	39.6431	0.311093
mmu-miR-382-5p	gaaguuguucgugguggauucg	hsa-miR-382-5p	24	16	25	45	64	44.7353	71.2536	140.868	236.726	148.86	778.267	-0.0846039	0.966107
mmu-miR-190b-5p	ugauauguuugauauuggguug	hsa-miR-190a-5p	23	3	28	24	41	42.8713	13.3601	157.772	126.254	95.3637	659.072	39.1141	0.229342
mmu-miR-666-5p	agcgggcacagcugugagagcc	rno-miR-666-5p	21	1e-10	9	1e-10	30	1.86e-10	4.45e-10	50.7125	5.26e-10	69.7783	120.491	1.59736	0.0637531
mmu-miR-184-3p	uggacggagaacugauaagggu	hsa-miR-184	21	27	24	7	36	39.1434	120.24	135.233	36.8241	83.734	507.185	-0.300539	0.836166
mmu-miR-7015-3p	ucucacuguccucugcacuagg	hsa-miR-1304-3p	20	5	12	11	23	37.2794	22.2668	67.6167	57.8664	53.4967	238.526	2.93451	0.345953
mmu-miR-493-5p	uuguacaugguaggcuuucauu	hsa-miR-493-5p	16	13	17	17	54	29.8235	57.8936	95.7903	89.4299	125.601	490.547	0.0635849	0.969404
mmu-miR-802-5p	ucaguaacaaagauucauccuug	rno-miR-802-5p	16	37	1e-10	1e-10	15	29.8235	164.774	5.63e-10	5.26e-10	34.8892	229.487	0.401928	0.806922
mmu-miR-211-5p	uucccuuugucauccuuugccu	hsa-miR-204-5p	16	5	77	24	16	29.8235	22.2668	433.874	126.254	37.2151	719.535	-0.282048	0.879336
mmu-miR-6964-3p	uuucuugucuuccacucuagg	hsa-miR-578	15	9	7	12	41	1.86e-10	4.45e-10	5.63e-10	63.127	95.3637	202.305	39.3831	0.495025
mmu-miR-376a-5p	guagauucuccuucuaugagu	hsa-miR-376a-5p	14	3	6	12	22	26.0956	13.3601	5.63e-10	63.127	51.1708	223.856	2.16927	0.0315178
mmu-miR-154-5p	uagguuauccguguugccuucg	hsa-miR-154-5p	13	5	49	46	42	24.2316	22.2668	276.101	241.987	97.6896	977.736	4.27871	0.241937
mmu-miR-6538-5p	cgcgggcuccggggcggc	-	13	22	2	1e-10	39	24.2316	97.9737	11.2694	5.26e-10	90.7118	224.187	1.42015	0.0504223
mmu-miR-129-5p	cuuuuugcggucugggcuugc	hsa-miR-129-5p	13	45	14	3	32	24.2316	200.401	78.8861	15.7817	74.4302	455.07	1.74079	0.0671322
mmu-miR-5126-3p	cgcgggcggggccgggggcgg	hsa-miR-4767	13	12	1e-10	1e-10	30	1.86e-10	4.45e-10	5.63e-10	5.26e-10	69.7783	69.7783	1.273	0.0737408
mmu-miR-7007-3p	cccauccacguuucuucuguagc	-	13	1e-10	5	5	32	24.2316	4.45e-10	5.63e-10	26.3029	74.4302	151.253	1.93282	0.48018
mmu-miR-187-3p	ucgugucuuguguugcagccgg	hsa-miR-187-3p	12	1e-10	24	21	25	1.86e-10	4.45e-10	135.233	110.472	58.1486	303.854	1.75828	0.106556
mmu-miR-7236-3p	uuggaccgcacagauuuagacc	-	12	2	13	15	24	22.3677	4.45e-10	73.2514	78.9087	55.8227	291.69	-0.180134	0.936733
mmu-miR-7046-3p	ugaaccacccaucccccuacagg	-	12	10	1e-10	2	11	22.3677	44.5335	5.63e-10	10.5212	25.5854	116.152	-0.0785701	0.937076
mmu-miR-376c-3p	aacauagaggaaauuucacgu	hsa-miR-376c-3p	11	12	29	27	30	20.5037	53.4402	163.407	142.036	69.7783	628.802	3.33428	0.266978
mmu-miR-1960-5p	ccagugcuguuagaagagggcu	-	11	1e-10	8	4	27	20.5037	4.45e-10	45.0778	21.0423	62.8005	193.238	-0.383538	0.705954
mmu-miR-6988-3p	ugaccucuguaucuccugccagc	hsa-miR-6821-3p	11	9	5	1e-10	11	20.5037	40.0802	28.1736	5.26e-10	25.5854	123.106	0.0974997	0.914094
mmu-miR-383-5p	agaucagaaggugacuguggcu	hsa-miR-383-5p	11	20	3	1e-10	9	20.5037	89.067	16.9042	5.26e-10	20.9335	169.315	0.573297	0.364216
mmu-miR-380-3p	uauguaguaugguccacaucu	hsa-miR-7852-3p	11	12	20	9	15	20.5037	53.4402	112.694	47.3452	34.8892	395.933	1.24019	0.0438018
mmu-miR-467d-5p	auaagugcgcgcauguauaug	-	11	9	24	9	15	20.5037	40.0802	135.233	5.26e-10	2.33e-10	195.817	-0.994668	0.486564
mmu-miR-3473d-5p	cacugagccacuuuccagcccu	-	10	1e-10	1e-10	1e-10	35	1.86e-10	4.45e-10	5.63e-10	5.26e-10	81.408	81.408	37.5814	0.495025
mmu-miR-3473g-3p	caaaagugaggcuggggagagg	hsa-miR-548t-5p	10	5	3	4	19	1.86e-10	22.2668	16.9042	5.26e-10	44.1929	83.3639	1.83608	0.2537
mmu-miR-598-3p	uacgucaucgucgucaucguuau	hsa-miR-598-3p	10	1e-10	5	8	1e-10	18.6397	4.45e-10	5.63e-10	42.0847	2.33e-10	161.496	2.11553	0.35297
mmu-miR-18a-5p	uaaggugcaucuagugcagau	hsa-miR-18a-5p	9	1e-10	70	39	32	16.7757	4.45e-10	394.431	205.163	74.4302	988.734	-38.7263	0.272228
mmu-miR-5709-5p	auacgcacacuuaagacuuuag	-	9	3	3	8	21	16.7757	13.3601	16.9042	42.0847	48.8448	186.165	0.813482	0.464302
mmu-miR-3058-3p	uuccugucagccgugggugccu	-	9	6	4	1e-10	18	16.7757	26.7201	22.5389	5.26e-10	41.867	107.902	0.138245	0.664229
mmu-miR-487b-3p	aaucguacagggucauccacu	hsa-miR-487b-3p	9	35	6	12	34	1.86e-10	4.45e-10	5.63e-10	63.127	79.0821	225.456	-2.12445	0.37745
mmu-miR-700-5p	uaaggcuccuuccugugcuugc	-	9	1e-10	40	50	1e-10	16.7757	4.45e-10	225.389	263.029	2.33e-10	658.543	37.8699	0.399226
mmu-miR-363-3p	aauugcacgguauccaucugu	hsa-miR-25-3p	9	65	43	16	20	16.7757	289.468	242.293	84.1693	46.5189	727.42	1.98351	0.0664688
mmu-miR-3098-5p	uccuaacagcaggaguaggagc	-	9	6	14	1e-10	27	16.7757	26.7201	78.8861	5.26e-10	62.8005	259.666	3.50877	0.0557689
mmu-miR-873a-5p	ugcaggaacuugugagucucc	-	9	5	1e-10	1e-10	4	16.7757	4.45e-10	5.63e-10	5.26e-10	2.33e-10	64.971	38.4018	0.495025
mmu-miR-188-5p	caucccuugcaugguggagggu	hsa-miR-188-5p	8	6	23	12	13	14.9118	26.7201	129.599	63.127	30.2373	448.613	1.44685	0.128698
mmu-miR-3060-3p	ccauagcacagaagcacuccca	-	8	5	2	4	17	1.86e-10	4.45e-10	5.63e-10	21.0423	39.541	60.5834	0.153235	0.942851
mmu-miR-5615-3p	ucucagaaaacaaccaaggacu	-	8	1e-10	1e-10	1e-10	11	14.9118	4.45e-10	5.63e-10	5.26e-10	25.5854	40.4972	38.2239	0.0408515
mmu-miR-135a-5p	uauggcuuuuuauuccuauguga	hsa-miR-135a-5p	7	4	9	12	17	13.0478	17.8134	50.7125	63.127	39.541	293.777	-1.30257	0.349706
mmu-miR-3089-3p	agcaucugcugauccugagcugu	-	7	1e-10	7	2	17	13.0478	4.45e-10	39.4431	10.5212	39.541	120.079	1.72829	0.0284002
mmu-miR-495-3p	aaacaaacauggugcacuucuu	hsa-miR-495-3p	7	6	40	34	10	1.86e-10	26.7201	225.389	178.86	2.33e-10	575.555	2.63202	0.0177194
mmu-miR-323-3p	cacauuacacggucgaccucu	hsa-miR-323a-3p	7	25	3	3	1e-10	13.0478	111.334	16.9042	15.7817	2.33e-10	174.593	-38.2345	0.272228
mmu-miR-1948-3p	uuuaggcagagcacucguacag	-	7	49	5	1e-10	15	1.86e-10	218.214	5.63e-10	5.26e-10	34.8892	279.392	-1.90389	0.409604
mmu-miR-3074-5p	uguuccugcugaacugagcca	-	7	2	4	5	10	1.86e-10	4.45e-10	5.63e-10	26.3029	2.33e-10	70.1168	-3.22986	0.323488
mmu-miR-489-3p	aaugacaccacauauauggc	hsa-miR-425-5p	7	1e-10	13	1e-10	1e-10	1.86e-10	4.45e-10	73.2514	5.26e-10	2.33e-10	160.879	0.482048	0.505054
mmu-miR-33-5p	gugcauuguaguugcauug	hsa-miR-33a-5p	7	5	20	13	27	1.86e-10	4.45e-10	112.694	5.26e-10	2.33e-10	204.704	3.3126	0.361249
mmu-miR-96-5p	uuuggcacuagcacauuuuugcu	hsa-miR-96-5p	7	1e-10	23	4	5	13.0478	4.45e-10	129.599	5.26e-10	2.33e-10	160.172	37.056	0.495025
mmu-miR-547-3p	cuugguacaucuuugagugaga	rno-miR-547-3p	6	1e-10	11	17	17	11.1838	4.45e-10	61.982	89.4299	39.541	351.104	1.11879	0.475082
mmu-miR-7075-3p	caaccaugucuucuuucccagc	-	6	1e-10	5	6	6	11.1838	4.45e-10	28.1736	31.5635	13.9557	115.546	1.00275	0.0309886
mmu-miR-7043-3p	uacugugccucucuguuuucaga	-	6	6	5	1e-10	12	1.86e-10	26.7201	28.1736	5.26e-10	2.33e-10	54.8937	37.8611	0.06712
mmu-miR-6948-5p	uguccuuccugucugaccaca	-	6	3	1e-10	3	1e-10	11.1838	13.3601	5.63e-10	15.7817	2.33e-10	49.0884	-3.06461	0.201136
mmu-miR-667-3p	ugacaccugccacccagcccaag	rno-miR-667-3p	6	1e-10	7	12	11	1.86e-10	4.45e-10	5.63e-10	63.127	25.5854	154.433	37.1285	0.225663
mmu-miR-505-3p	gucaacacuugcugguuuucuc	rno-miR-505-3p	6	1e-10	4	7	1e-10	1.86e-10	4.45e-10	5.63e-10	36.8241	2.33e-10	36.8241	-0.845966	0.596858
mmu-miR-3076-3p	cgcacucuggucuucccuugcaga	-	6	1e-10	1e-10	1e-10	1e-10	11.1838	4.45e-10	5.63e-10	5.26e-10	2.33e-10	11.1838	0.949531	0.522405
mmu-miR-34b-5p	aggcaguguaauuagcugauugu	hsa-miR-34a-5p	5	4	10	6	12	9.31986	17.8134	56.3472	31.5635	27.9113	195.532	37.5876	0.445381
mmu-miR-449a-5p	uggcaguguauuguuagcuggu	hsa-miR-34a-5p	5	7	6	5	18	1.86e-10	31.1735	33.8083	26.3029	41.867	159.44	2.85068	0.281316
mmu-miR-467e-5p	auaagugugagcauguauaugu	-	5	1e-10	1e-10	1e-10	4	9.31986	4.45e-10	5.63e-10	5.26e-10	9.30378	18.6236	36.793	0.495025
mmu-miR-6990-3p	cccagggugagucagggcucu	-	5	9	4	3	15	1.86e-10	40.0802	5.63e-10	5.26e-10	34.8892	96.8763	37.2849	0.240114
mmu-miR-5621-3p	ugggcccuccagaccucaugc	-	5	10	1e-10	4	20	9.31986	44.5335	5.63e-10	5.26e-10	46.5189	100.372	37.1717	0.222216
mmu-miR-543-3p	aaacauucgcggugcacuucuu	hsa-miR-543	5	17	5	6	19	9.31986	75.707	5.63e-10	5.26e-10	44.1929	186.178	0.956867	0.742727
mmu-miR-1258-3p	uuagggaauuagcucagcagu	-	5	1e-10	1e-10	9	23	9.31986	4.45e-10	5.63e-10	47.3452	53.4967	206.552	-37.6939	0.272228
mmu-miR-1955-3p	gagcauugcaugcugggaca	-	5	1e-10	1e-10	8	1e-10	9.31986	4.45e-10	5.63e-10	42.0847	2.33e-10	51.4045	0.573484	0.817248
mmu-miR-7668-5p	cacucugaauaaccugcucucugu	hsa-miR-4714-5p	5	1e-10	1e-10	1e-10	1e-10	9.31986	4.45e-10	5.63e-10	5.26e-10	2.33e-10	9.31986	1.50881	0.127288
mmu-miR-1224-5p	gugaggacuggggagguggag	hsa-miR-1224-5p	5	1e-10	1e-10	1e-10	1e-10	9.31986	4.45e-10	5.63e-10	5.26e-10	2.33e-10	9.31986	2.06757	0.156446
mmu-miR-6989-3p	uguccacugucucuggucccagc	-	5	4	3	1e-10	16	9.31986	17.8134	16.9042	5.26e-10	37.2151	98.7781	-1.54436	0.460093
mmu-miR-201-5p	uacucaguaaggcauuguucuu	rno-miR-201-5p	4	5	1e-10	6	8	7.45588	22.2668	5.63e-10	31.5635	2.33e-10	118.244	-1.52906	0.43889
mmu-miR-301b-3p	cagugcaaugguauugucaaagc	hsa-miR-130a-3p	4	1e-10	8	1e-10	4	7.45588	4.45e-10	45.0778	5.26e-10	9.30378	92.5072	1.2543	0.196399
mmu-miR-3572-3p	uuacacuuguccuucuuucccc	rno-miR-3572	4	1e-10	1e-10	3	1e-10	1.86e-10	4.45e-10	5.63e-10	5.26e-10	2.33e-10	35.0511	37.5164	0.495025
mmu-miR-3065-5p	ucaacaaaaucacugaugcug	hsa-miR-3065-5p	4	1e-10	1e-10	1e-10	1e-10	7.45588	4.45e-10	5.63e-10	5.26e-10	2.33e-10	7.45588	-2.51299	0.262771
mmu-miR-7010-5p	ucggaaaggauugggaaac	-	4	1e-10	1e-10	1e-10	1e-10	7.45588	4.45e-10	5.63e-10	5.26e-10	2.33e-10	7.45588	-2.11893	0.214412
mmu-miR-137-3p	uuauugcuuaagaauacgcgua	hsa-miR-137	4	1e-10	1e-10	1e-10	1e-10	7.45588	4.45e-10	5.63e-10	5.26e-10	2.33e-10	7.45588	37.3779	0.495025
mmu-miR-494-3p	ugaaacauacacgggaaaccucu	hsa-miR-494-3p	4	1e-10	1e-10	5	1e-10	7.45588	4.45e-10	5.63e-10	26.3029	2.33e-10	33.7588	37.3779	0.495025
mmu-miR-7085-3p	cuagcuggccucuccccacc	-	4	6	1e-10	1e-10	7	1.86e-10	26.7201	5.63e-10	5.26e-10	2.33e-10	26.7201	-1.54238	0.462082
mmu-miR-7237-3p	cauccuguugagcuuaccgagc	-	4	2	1e-10	1e-10	12	7.45588	8.9067	5.63e-10	5.26e-10	27.9113	57.4181	0.589953	0.823858
mmu-miR-6956-3p	ugaccggccuauccucucagg	-	3	7	2	1e-10	19	5.59191	31.1735	11.2694	5.26e-10	44.1929	105.372	36.1715	0.495025
mmu-miR-669c-5p	auaguuguguguggaugugugu	-	3	1e-10	9	3	7	5.59191	4.45e-10	50.7125	15.7817	16.2816	123.419	2.72721	0.559134
mmu-miR-679-5p	uuggacugugaggugacucuuggu	hsa-miR-1269a	3	3	1e-10	6	27	1.86e-10	4.45e-10	5.63e-10	31.5635	62.8005	155.703	1.12491	0.251372
mmu-miR-490-3p	caaccuggaggacuccaugcugu	hsa-miR-490-3p	3	17	1e-10	1e-10	18	5.59191	75.707	5.63e-10	5.26e-10	41.867	162.598	36.5368	0.271563
mmu-miR-299b-3p	guaugugggacgguaaaccau	hsa-miR-299-3p	3	2	1e-10	1e-10	2	5.59191	8.9067	5.63e-10	5.26e-10	4.65189	19.1505	36.6589	0.0855585
mmu-miR-879-5p	agaggcuuauagcucuaagccu	hsa-miR-3188	3	1e-10	3	3	11	5.59191	4.45e-10	16.9042	5.26e-10	25.5854	105.04	36.4477	0.300091
mmu-miR-496a-3p	aguauuacauggccaaucucc	rno-miR-496-3p	3	3	26	10	12	1.86e-10	13.3601	146.503	52.6058	2.33e-10	269.427	36.4799	0.495025
mmu-miR-208a-3p	auaagacgagcaaaaagcuug	hsa-miR-208a-3p	3	1e-10	1e-10	1e-10	4	5.59191	4.45e-10	5.63e-10	5.26e-10	2.33e-10	62.55	1.47061	0.520159
mmu-miR-8105-3p	aggcgacuggcgagacccga	-	3	1e-10	1e-10	1e-10	1e-10	5.59191	4.45e-10	5.63e-10	5.26e-10	2.33e-10	5.59191	37.1149	0.495025
mmu-miR-5107-3p	caaccugugcuucucuucccagu	hsa-miR-649	3	1e-10	1e-10	1e-10	1e-10	5.59191	4.45e-10	5.63e-10	5.26e-10	2.33e-10	5.59191	37.056	0.495025
mmu-miR-670-3p	ccucauauccauucaggagug	-	3	1e-10	1e-10	1e-10	1e-10	5.59191	4.45e-10	5.63e-10	5.26e-10	2.33e-10	5.59191	4.19248	0.18239
mmu-miR-344d-3-3p	gauauaaccacugccagacug	hsa-miR-410-3p	3	1e-10	1e-10	1e-10	1e-10	5.59191	4.45e-10	5.63e-10	5.26e-10	2.33e-10	5.59191	-37.0418	0.272228
mmu-miR-6901-5p	ugcaggaaugcagaggaccu	-	3	6	1e-10	1e-10	2	1.86e-10	4.45e-10	5.63e-10	5.26e-10	4.65189	30.9402	3.30283	0.198445
mmu-miR-6914-3p	ucuguccaccucuucccagg	-	3	1e-10	1e-10	1e-10	3	1.86e-10	4.45e-10	5.63e-10	5.26e-10	6.97783	6.97783	-0.757389	0.433338
mmu-miR-5100-3p	guucgaaucccagcggugc	-	3	1e-10	2	1	8	1.86e-10	4.45e-10	5.63e-10	5.26e-10	18.6076	18.6076	36.8895	0.232006
mmu-miR-344d-1-3p	gauauaaccacugccagacuga	hsa-miR-410-3p	3	1e-10	1e-10	1e-10	9	1.86e-10	4.45e-10	5.63e-10	5.26e-10	20.9335	38.4591	2.1932	0.179873
mmu-miR-384-5p	uguaaacaauuccuaggcaaug	hsa-miR-30a-5p	3	14	6	1e-10	17	5.59191	4.45e-10	5.63e-10	5.26e-10	39.541	45.133	-0.498268	0.78652
mmu-miR-6952-5p	ggugggcggugaaacagagagc	-	3	1e-10	1e-10	1e-10	1e-10	5.59191	4.45e-10	5.63e-10	5.26e-10	2.33e-10	5.59191	-1.47473	0.189144
mmu-miR-7051-5p	ucaccaggaggaaguugggucag	hsa-miR-4733-3p	3	1e-10	1e-10	1e-10	1e-10	5.59191	4.45e-10	5.63e-10	5.26e-10	2.33e-10	5.59191	2.13515	0.101424
mmu-miR-412-5p	uggucgaccagcuggaaagu	hsa-miR-412-5p	3	1e-10	1e-10	1e-10	8	5.59191	4.45e-10	5.63e-10	5.26e-10	18.6076	24.1995	-0.0186477	0.98721
mmu-miR-452-5p	aacuguuugcagaggaaacug	hsa-miR-452-5p	3	3	1e-10	1e-10	1e-10	1.86e-10	13.3601	5.63e-10	5.26e-10	2.33e-10	13.3601	-36.8194	0.272228
mmu-miR-3066-5p	uugguugcuguagauuaaguagu	-	3	3	4	1e-10	5	5.59191	13.3601	22.5389	5.26e-10	11.6297	53.1206	0.00819945	0.996069
mmu-miR-296-5p	agggcccccccucaauccugu	hsa-miR-296-5p	2	1e-10	11	5	6	3.72794	4.45e-10	61.982	26.3029	13.9557	132.257	2.34073	0.33493
mmu-miR-672-5p	ugagguugguguacuguguguga	hsa-miR-377-5p	2	1e-10	4	1e-10	5	3.72794	4.45e-10	22.5389	5.26e-10	11.6297	59.8035	-0.796183	0.665886
mmu-miR-374c-5p	auaauacaaccugcuaagug	hsa-miR-655-3p	2	1e-10	1e-10	1e-10	1e-10	3.72794	4.45e-10	5.63e-10	5.26e-10	2.33e-10	3.72794	0.411118	0.774076
mmu-miR-1193-5p	augguagaccggugacguac	-	2	1e-10	1e-10	1e-10	1e-10	3.72794	4.45e-10	5.63e-10	5.26e-10	2.33e-10	3.72794	-0.785072	0.717847
mmu-miR-7653-3p	ccccuacuguuccaccccgc	-	2	1e-10	1e-10	1e-10	1e-10	3.72794	4.45e-10	5.63e-10	5.26e-10	2.33e-10	3.72794	2.2817	0.48122
mmu-miR-7079-3p	ugacuucuguucucuuuccagg	hsa-miR-6505-3p	2	1e-10	1e-10	1e-10	1e-10	3.72794	4.45e-10	5.63e-10	5.26e-10	2.33e-10	3.72794	0.762154	0.595207
mmu-miR-5624-3p	uuaaggcagaguuuacaauagg	-	2	1e-10	1e-10	1e-10	1e-10	3.72794	4.45e-10	5.63e-10	5.26e-10	2.33e-10	3.72794	35.8682	0.248087
mmu-miR-6962-3p	uaucugcccuucccuguccuaua	-	2	1e-10	1e-10	1e-10	2	1.86e-10	4.45e-10	5.63e-10	5.26e-10	4.65189	4.65189	1.33594	0.679388
mmu-miR-491-5p	aguggggaacccuuccaugaggag	hsa-miR-491-5p	2	1e-10	1e-10	4	1e-10	1.86e-10	4.45e-10	5.63e-10	21.0423	2.33e-10	56.0935	-36.4824	0.272228
mmu-miR-1938-5p	cggugggacuuguaguucgguc	-	2	1e-10	3	1e-10	8	1.86e-10	4.45e-10	16.9042	5.26e-10	2.33e-10	34.4297	0.87125	0.653345
mmu-miR-6392-5p	ucuggcgcccugguccugucagc	-	2	1e-10	6	1e-10	1e-10	3.72794	4.45e-10	33.8083	5.26e-10	2.33e-10	46.2991	34.8949	0.495025
mmu-miR-1298-5p	uucauucggcuguccagaugua	hsa-miR-1298-5p	2	3	4	1e-10	9	3.72794	13.3601	22.5389	5.26e-10	20.9335	91.2301	36.3238	0.495025
mmu-miR-3475-3p	ucuggaggcacaugguuugaag	-	2	2	1e-10	1e-10	4	3.72794	8.9067	5.63e-10	5.26e-10	2.33e-10	34.5416	-36.4044	0.272228
mmu-miR-208b-3p	auaagacgaacaaaagguuug	hsa-miR-208a-3p	1e-10	9	561	838	1384	1.86e-10	40.0802	3161.08	4408.37	3219.11	16612.1	36.282	0.495025
mmu-miR-6715-5p	acaggcaccacagguuugagc	hsa-miR-4269	1e-10	2	3	4	6	1.86e-10	8.9067	16.9042	21.0423	13.9557	78.3344	1.95787	0.0566136
mmu-miR-8103-5p	ucuccuguucucuguucucccu	-	1e-10	1e-10	16	7	47	1.86e-10	4.45e-10	90.1556	36.8241	109.319	236.299	-2.56744	0.362852
mmu-miR-6516-5p	uuugcaguaacagguguggacauc	hsa-miR-6516-5p	1e-10	24	29	31	90	1.86e-10	106.88	163.407	163.078	209.335	642.7	35.6409	0.495025
mmu-miR-1982-3p	ucucacccuauguucucccaca	hsa-miR-6784-3p	1e-10	1e-10	6	10	7	1.86e-10	4.45e-10	33.8083	52.6058	16.2816	155.272	34.6938	0.495025
mmu-miR-592-5p	uugugucaauaugcgaugaugu	hsa-miR-592	1e-10	13	12	18	32	1.86e-10	57.8936	67.6167	94.6905	74.4302	342.826	36.1014	0.495025
mmu-miR-669b-5p	aguuuugugugcaugugcaug	-	1e-10	1e-10	6	2	4	1.86e-10	4.45e-10	33.8083	10.5212	9.30378	53.6333	-34.1479	0.272228
mmu-miR-3069-3p	uuggacacuaaguacugccaca	-	1e-10	1e-10	2	1e-10	5	1.86e-10	4.45e-10	11.2694	5.26e-10	11.6297	40.4247	-2.92959	0.338299
mmu-miR-3072-3p	ugcccccuccaggaagccuucu	hsa-miR-4313	1e-10	1e-10	2	2	1e-10	1.86e-10	4.45e-10	11.2694	10.5212	2.33e-10	21.7906	-32.5629	0.272228
mmu-miR-28a-3p	cacuagauugugagcugcugga	hsa-miR-28-3p	1e-10	1e-10	571	678	1e-10	1.86e-10	4.45e-10	3217.43	3566.68	2.33e-10	10105.2	35.8975	0.264362
mmu-miR-668-3p	ugucacucggcucggcccacu	hsa-miR-668-3p	1e-10	20	12	15	39	1.86e-10	4.45e-10	67.6167	78.9087	2.33e-10	199.102	35.8949	0.495025
mmu-miR-871-3p	ugacuggcaccauucuggauaau	rno-miR-871-3p	1e-10	1e-10	4	7	1e-10	1.86e-10	4.45e-10	22.5389	36.8241	2.33e-10	85.6513	2.61126	0.344792
mmu-miR-1964-3p	ccgacuucugggcuccggcuuu	-	1e-10	69	14	11	162	1.86e-10	307.281	5.63e-10	57.8664	376.803	812.053	0.185487	0.931504
mmu-miR-144-5p	ggauaucaucauauacuguaagu	hsa-miR-144-5p	1e-10	300	1e-10	296	1e-10	1.86e-10	1336.01	5.63e-10	1557.13	2.33e-10	2893.14	34.3719	0.495025
mmu-miR-423-5p	ugaggggcagagagcgagacuuu	hsa-miR-423-5p	1e-10	3015	1e-10	1e-10	6052	1.86e-10	13426.9	5.63e-10	5.26e-10	14076.6	27503.5	-0.508543	0.816638
mmu-miR-3100-3p	cugugacacacccgcucccagu	-	1e-10	5	2	2	1e-10	1.86e-10	22.2668	11.2694	10.5212	2.33e-10	44.0574	35.7217	0.180809
mmu-miR-147-3p	gugugcggaaaugcuucugcua	hsa-miR-147b	1e-10	5	3	1e-10	3	1.86e-10	22.2668	16.9042	5.26e-10	2.33e-10	39.1709	0.265362	0.843308
mmu-miR-6952-3p	ucucugacucugccucccacaga	hsa-miR-301a-5p	1e-10	4	1e-10	2	1	1.86e-10	17.8134	5.63e-10	10.5212	2.32594	30.6605	1.58995	0.64643
mmu-miR-370-3p	gccugcugggguggaaccuggu	hsa-miR-370-3p	1e-10	45	6	1e-10	20	1.86e-10	200.401	33.8083	5.26e-10	46.5189	280.728	35.6539	0.495025
mmu-miR-153-3p	uugcauagucacaaaagugauc	hsa-miR-153-3p	1e-10	35	3	3	9	1.86e-10	155.867	16.9042	15.7817	20.9335	380.361	35.6539	0.495025
mmu-miR-6929-3p	caggugcugucuucuucuuccagg	-	1e-10	10	2	5	19	1.86e-10	44.5335	11.2694	5.26e-10	2.33e-10	77.7099	1.63542	0.486793
mmu-miR-345-5p	ugcugaccccuaguccagugcu	rno-miR-345-5p	1e-10	1e-10	646	341	1e-10	1.86e-10	4.45e-10	3640.03	1793.86	2.33e-10	6870.99	-1.22207	0.380751
mmu-miR-1193-3p	uaggucacccguuuuacuauc	hsa-miR-370-5p	1e-10	1e-10	4	2	1e-10	1.86e-10	4.45e-10	22.5389	10.5212	2.33e-10	33.0601	-35.6939	0.272228
mmu-miR-760-3p	cggcucugggucuguggggagc	hsa-miR-760	1e-10	12	1e-10	2	1e-10	1.86e-10	53.4402	5.63e-10	10.5212	2.33e-10	63.9614	35.5418	0.495025
mmu-miR-6418-3p	acugcaaccuccuuucuccagg	hsa-miR-4772-3p	1e-10	1e-10	1e-10	2	2	1.86e-10	4.45e-10	5.63e-10	10.5212	4.65189	15.1731	2.59597	0.56568
mmu-miR-106b-5p	uaaagugcugacagugcagau	hsa-miR-17-5p	1e-10	1e-10	565	249	1e-10	1.86e-10	4.45e-10	3183.62	1309.89	2.33e-10	5676.48	2.23697	0.587436
mmu-miR-708-3p	caacuagacugugagcuucuaga	hsa-miR-708-3p	1e-10	1e-10	105	42	1e-10	1.86e-10	4.45e-10	591.646	220.944	2.33e-10	812.59	-0.616147	0.712071
mmu-miR-1197-3p	uaggacacauggucuacuucu	hsa-miR-1197	1e-10	8	1e-10	1e-10	2	1.86e-10	35.6268	5.63e-10	5.26e-10	4.65189	40.2787	35.3719	0.495025
mmu-miR-675-3p	uguaugcccuaaccgcucagu	rno-miR-675-3p	1e-10	1e-10	36	8	15	1.86e-10	4.45e-10	202.85	5.26e-10	34.8892	373.562	35.3719	0.495025
mmu-miR-20b-5p	caaagugcucauagugcagguag	hsa-miR-17-5p	1e-10	1e-10	32	2	2	1.86e-10	4.45e-10	180.311	10.5212	4.65189	208.628	35.3644	0.495025
mmu-miR-455-5p	uaugugccuuuggacuacaucg	hsa-miR-455-5p	1e-10	21	74	1e-10	51	1.86e-10	93.5204	416.97	5.26e-10	118.623	629.113	0.193906	0.936178
mmu-miR-1955-5p	agucccaggaugcacugcagcuu	-	1e-10	2	2	1e-10	13	1.86e-10	8.9067	11.2694	5.26e-10	30.2373	50.4134	34.4939	0.219233
mmu-miR-6960-5p	aggaugagaagaguuuggcugg	hsa-miR-1255a	1e-10	1e-10	1e-10	1e-10	1	1.86e-10	4.45e-10	5.63e-10	5.26e-10	2.32594	2.32594	-3.52204	0.312538
mmu-miR-7646-5p	acaagagaacugaucagugcug	-	1e-10	1e-10	1e-10	1e-10	2	1.86e-10	4.45e-10	5.63e-10	5.26e-10	4.65189	4.65189	35.2784	0.495025
mmu-miR-217-5p	auacugcaucaggaacugacugg	-	1e-10	1e-10	1e-10	1e-10	2	1.86e-10	4.45e-10	5.63e-10	5.26e-10	4.65189	4.65189	-0.982475	0.652528
mmu-miR-6920-5p	cacaauggaaagacugcuugu	-	1e-10	1e-10	1e-10	1e-10	2	1.86e-10	4.45e-10	5.63e-10	5.26e-10	4.65189	4.65189	34.3644	0.495025
mmu-miR-325-5p	ccuaguaggugcucaguaagu	hsa-miR-325	1e-10	1e-10	1e-10	1e-10	2	1.86e-10	4.45e-10	5.63e-10	5.26e-10	4.65189	4.65189	35.1793	0.495025
mmu-miR-6540-5p	cuaaggcaggcagacuucagugu	-	1e-10	1e-10	1e-10	1e-10	2	1.86e-10	4.45e-10	5.63e-10	5.26e-10	4.65189	4.65189	0.482048	0.505054
mmu-miR-6950-3p	cucugucuugauccucuccagg	hsa-miR-6888-3p	1e-10	1e-10	1e-10	1e-10	2	1.86e-10	4.45e-10	5.63e-10	5.26e-10	4.65189	4.65189	0.482048	0.505054
mmu-miR-6953-3p	cugacccagccucuauguccccagc	-	1e-10	1e-10	1e-10	1e-10	2	1.86e-10	4.45e-10	5.63e-10	5.26e-10	4.65189	4.65189	-33.7389	0.046664
mmu-miR-871-5p	uauucagauuagugccagucaug	hsa-miR-892c-5p	1e-10	1e-10	1e-10	1e-10	2	1.86e-10	4.45e-10	5.63e-10	5.26e-10	4.65189	4.65189	34.056	0.495025
mmu-miR-6951-5p	uguauuugugugauuaaagu	-	1e-10	1e-10	1e-10	1e-10	2	1.86e-10	4.45e-10	5.63e-10	5.26e-10	4.65189	4.65189	1.23381	0.694645
mmu-miR-7212-3p	cuaacacacacgucuccagguc	-	1e-10	1e-10	1e-10	1e-10	2	1.86e-10	4.45e-10	5.63e-10	5.26e-10	4.65189	13.4147	35.0237	0.281184
mmu-miR-7020-3p	aaccccucucuucucucccagg	-	1e-10	1e-10	1e-10	1e-10	3	1.86e-10	4.45e-10	5.63e-10	5.26e-10	6.97783	6.97783	34.1945	0.495025
mmu-miR-7658-3p	ccaccuuccucacccacgcuguc	-	1e-10	1e-10	1e-10	1e-10	3	1.86e-10	4.45e-10	5.63e-10	5.26e-10	6.97783	6.97783	0.729439	0.649417
mmu-miR-3109-3p	uagggccaucucauccagaua	hsa-miR-6895-5p	1e-10	1e-10	1e-10	1e-10	3	1.86e-10	4.45e-10	5.63e-10	5.26e-10	6.97783	6.97783	32.1945	0.495025
mmu-miR-465c-5p	uauuuagaauggcgcugaucug	rno-miR-465-5p	1e-10	1e-10	1e-10	1e-10	3	1.86e-10	4.45e-10	5.63e-10	5.26e-10	6.97783	6.97783	0.482048	0.505054
mmu-miR-219c-3p	ucgagaauugcguuuggacaau	-	1e-10	1e-10	1e-10	1e-10	3	1.86e-10	4.45e-10	5.63e-10	5.26e-10	6.97783	6.97783	-1.05648	0.59557
mmu-miR-7240-5p	uuggagaggaccgccgucggac	-	1e-10	1e-10	1e-10	1e-10	3	1.86e-10	4.45e-10	5.63e-10	5.26e-10	6.97783	6.97783	34.793	0.495025
mmu-miR-761-3p	uuucacuuugcugcuccuccu	-	1e-10	1e-10	1e-10	1e-10	3	1.86e-10	4.45e-10	5.63e-10	5.26e-10	6.97783	6.97783	33.1945	0.495025
mmu-miR-669h-5p	uuugcauguguguauaguugugu	-	1e-10	1e-10	1e-10	1e-10	3	1.86e-10	4.45e-10	5.63e-10	5.26e-10	6.97783	6.97783	-34.8194	0.272228
mmu-miR-3620-5p	cugugggcugggcugggaagc	hsa-miR-4296	1e-10	1e-10	1e-10	1e-10	4	1.86e-10	4.45e-10	5.63e-10	5.26e-10	9.30378	9.30378	34.6938	0.495025
mmu-miR-3103-3p	uaaccucugauccuucccacag	-	1e-10	1e-10	1e-10	1e-10	4	1.86e-10	4.45e-10	5.63e-10	5.26e-10	9.30378	9.30378	34.6938	0.495025
mmu-miR-7675-3p	uuguuucauuuguucgugacu	-	1e-10	1e-10	1e-10	1e-10	4	1.86e-10	4.45e-10	5.63e-10	5.26e-10	9.30378	9.30378	34.6938	0.495025
mmu-miR-7013-5p	ugaagaggccaguguuguagcu	-	1e-10	1e-10	1e-10	1e-10	4	1.86e-10	4.45e-10	5.63e-10	5.26e-10	9.30378	26.8293	0.339453	0.891914
mmu-miR-7660-3p	aucuguaagugaugggcaaagu	hsa-miR-3686	1e-10	1e-10	1e-10	1e-10	5	1.86e-10	4.45e-10	5.63e-10	5.26e-10	11.6297	11.6297	1.14951	0.708199
mmu-miR-6913-5p	cucuacugauuugucuccucagg	-	1e-10	1e-10	1e-10	1e-10	5	1.86e-10	4.45e-10	5.63e-10	5.26e-10	11.6297	11.6297	34.471	0.495025
mmu-miR-5114-5p	aacuggagacggaagcugcaa	-	1e-10	1e-10	1e-10	1e-10	6	1.86e-10	4.45e-10	5.63e-10	5.26e-10	13.9557	13.9557	34.471	0.495025
mmu-miR-669o-3p	acauaacauacacacacacgu	-	1e-10	1e-10	1e-10	1e-10	6	1.86e-10	4.45e-10	5.63e-10	5.26e-10	13.9557	13.9557	-34.5564	0.272228
mmu-miR-219b-3p	agaauugcguuuggacaaucagu	hsa-miR-219b-3p	1e-10	1e-10	1e-10	1e-10	6	1.86e-10	4.45e-10	5.63e-10	5.26e-10	13.9557	13.9557	-34.5564	0.272228
mmu-miR-6999-3p	cuucagcuguccuccuuucugu	-	1e-10	1e-10	1e-10	1e-10	6	1.86e-10	4.45e-10	5.63e-10	5.26e-10	13.9557	13.9557	34.4223	0.219723
mmu-miR-7235-3p	ucugacuucuugcuucucuccu	rno-miR-3583-3p	1e-10	1e-10	1e-10	1e-10	6	1.86e-10	4.45e-10	5.63e-10	5.26e-10	13.9557	13.9557	34.3719	0.495025
mmu-miR-7091-3p	aguggcuucugucgucucu	-	1e-10	1e-10	1e-10	1e-10	7	1.86e-10	4.45e-10	5.63e-10	5.26e-10	16.2816	16.2816	34.3719	0.495025
mmu-miR-6958-3p	ucagcugccucuugccaucacag	-	1e-10	1e-10	1e-10	1e-10	7	1.86e-10	4.45e-10	5.63e-10	5.26e-10	16.2816	16.2816	34.3644	0.495025
mmu-miR-7668-3p	ccacucugaauaaccugcucucugu	-	1e-10	3	1e-10	1e-10	8	1.86e-10	4.45e-10	5.63e-10	5.26e-10	18.6076	18.6076	33.471	0.495025
mmu-miR-505-5p	gggagccaggaaguauugauguu	hsa-miR-505-5p	1e-10	1e-10	1e-10	1e-10	8	1.86e-10	4.45e-10	5.63e-10	5.26e-10	18.6076	18.6076	-2.22499	0.0939535
mmu-miR-7213-5p	acugggucucuugagguagcc	-	1e-10	1e-10	1e-10	1e-10	8	1.86e-10	4.45e-10	5.63e-10	5.26e-10	18.6076	31.7517	-0.587454	0.787877
mmu-miR-1966-3p	uuucugacucaacucucccuuagc	-	1e-10	1e-10	1e-10	1e-10	9	1.86e-10	4.45e-10	5.63e-10	5.26e-10	20.9335	20.9335	34.1945	0.495025
mmu-miR-7661-3p	uugacucccaguuucucucug	-	1e-10	1e-10	1e-10	2	2	1.86e-10	4.45e-10	5.63e-10	10.5212	2.33e-10	10.5212	34.1945	0.495025
mmu-miR-1958-3p	uaggaaaguggaagcaguaagu	-	1e-10	1e-10	1e-10	2	1e-10	1.86e-10	4.45e-10	5.63e-10	10.5212	2.33e-10	10.5212	34.1945	0.495025
mmu-miR-665-3p	accaggaggcugaggucccu	hsa-miR-665	1e-10	4	1e-10	6	13	1.86e-10	4.45e-10	5.63e-10	5.26e-10	30.2373	82.814	-34.2345	0.272228
mmu-miR-7673-3p	uuccuuaccucaccgucaaagg	-	1e-10	2	2	1e-10	1e-10	1.86e-10	4.45e-10	11.2694	5.26e-10	2.33e-10	11.2694	-33.2345	0.272228
mmu-miR-7047-3p	ccccugcucugaagaagg	-	1e-10	1e-10	2	1e-10	1e-10	1.86e-10	4.45e-10	11.2694	5.26e-10	2.33e-10	11.2694	0.482048	0.505054
mmu-miR-873a-3p	gagacugacaaguucccggga	hsa-miR-4499	1e-10	1e-10	2	1e-10	1e-10	1.86e-10	4.45e-10	11.2694	5.26e-10	2.33e-10	11.2694	0.482048	0.505054
mmu-miR-1258-5p	ugcugagcuaauucccuaacug	hsa-miR-4663	1e-10	1e-10	2	1e-10	1e-10	1.86e-10	4.45e-10	11.2694	5.26e-10	2.33e-10	11.2694	34.056	0.495025
mmu-miR-6900-5p	uggugaugggcucucuuguagg	-	1e-10	1e-10	2	1e-10	1e-10	1.86e-10	4.45e-10	11.2694	5.26e-10	2.33e-10	11.2694	34.056	0.495025
mmu-miR-701-3p	uaucuauuaaagaggcuagc	-	1e-10	1e-10	2	1e-10	1e-10	1.86e-10	4.45e-10	11.2694	5.26e-10	2.33e-10	20.0322	34.056	0.495025
mmu-miR-219a-5p	ugauuguccaaacgcaauucucga	hsa-miR-219a-5p	1e-10	1e-10	1e-10	1e-10	18	1.86e-10	4.45e-10	5.63e-10	5.26e-10	41.867	41.867	34.0018	0.495025
mmu-miR-6966-3p	ugcugugugcuuccucugcagg	-	1e-10	1e-10	1	3	1e-10	1.86e-10	4.45e-10	5.63e-10	15.7817	2.33e-10	15.7817	34.0018	0.495025
mmu-miR-6976-3p	aucucccucccaacuccccagg	hsa-miR-6867-3p	1e-10	1e-10	1e-10	3	1e-10	1.86e-10	4.45e-10	5.63e-10	15.7817	2.33e-10	15.7817	33.9569	0.495025
mmu-miR-7212-5p	ucugggggcuugugugguaggg	hsa-miR-637	1e-10	1e-10	1e-10	3	1e-10	1.86e-10	4.45e-10	5.63e-10	15.7817	2.33e-10	15.7817	33.9569	0.495025
mmu-miR-3963-5p	aucccacuucugacacug	hsa-miR-3156-3p	1e-10	1e-10	1e-10	1e-10	22	1.86e-10	4.45e-10	5.63e-10	5.26e-10	51.1708	51.1708	33.9569	0.495025
mmu-miR-700-3p	cacgcgggaaccgaguccacc	-	1e-10	1e-10	1e-10	1e-10	22	1.86e-10	4.45e-10	5.63e-10	5.26e-10	51.1708	51.1708	33.9001	0.288398
mmu-miR-3081-3p	uugcgcuccgaucucugag	-	1e-10	1e-10	3	4	1e-10	1.86e-10	4.45e-10	5.63e-10	21.0423	2.33e-10	21.0423	33.7795	0.495025
mmu-miR-3108-3p	gucucuaaagcuagacguuccgg	-	1e-10	1e-10	1e-10	4	1e-10	1.86e-10	4.45e-10	5.63e-10	21.0423	2.33e-10	21.0423	33.7795	0.495025
mmu-miR-7688-5p	uagcugggcaugaucugaugagc	-	1e-10	1e-10	1e-10	1e-10	26	1.86e-10	4.45e-10	5.63e-10	5.26e-10	60.4745	60.4745	33.7795	0.495025
mmu-miR-3086-3p	cccaaugagccuacagucuaag	-	1e-10	1e-10	3	1e-10	1e-10	1.86e-10	4.45e-10	16.9042	5.26e-10	2.33e-10	16.9042	33.7795	0.495025
mmu-miR-135b-5p	uauggcuuuucauuccuaugugau	hsa-miR-135a-5p	1e-10	1e-10	3	1e-10	1e-10	1.86e-10	4.45e-10	16.9042	5.26e-10	2.33e-10	16.9042	33.7795	0.495025
mmu-miR-5120-5p	uuggggcuguggugccaccagcu	-	1e-10	1e-10	3	1e-10	1e-10	1.86e-10	4.45e-10	16.9042	5.26e-10	2.33e-10	16.9042	32.1945	0.495025
mmu-miR-129-3p	aagcccuuaccccaaaaagcau	hsa-miR-129-1-3p	1e-10	1e-10	1e-10	5	1e-10	1.86e-10	4.45e-10	5.63e-10	26.3029	2.33e-10	26.3029	-33.8194	0.272228
mmu-miR-5122-5p	ccgcgggacccggggcug	-	1e-10	1e-10	1e-10	5	1e-10	1.86e-10	4.45e-10	5.63e-10	26.3029	2.33e-10	26.3029	-33.8194	0.272228
mmu-miR-3058-5p	ucagccacggcuuaccuggaa	hsa-miR-4691-3p	1e-10	1e-10	1e-10	5	1e-10	1.86e-10	4.45e-10	5.63e-10	26.3029	2.33e-10	26.3029	-33.8194	0.272228
mmu-miR-3473b-5p	ggggcuggagagauggcuc	hsa-miR-762	1e-10	1e-10	1e-10	1e-10	34	1.86e-10	4.45e-10	5.63e-10	5.26e-10	79.0821	79.0821	-33.8194	0.272228
mmu-miR-491-3p	cuuaugcaagauucccuucuacc	hsa-miR-491-3p	1e-10	1e-10	4	1e-10	1e-10	1.86e-10	4.45e-10	22.5389	5.26e-10	2.33e-10	22.5389	-33.8194	0.272228
mmu-miR-7219-3p	uauccggguuucuaacacacu	-	1e-10	1e-10	4	1e-10	1e-10	1.86e-10	4.45e-10	22.5389	5.26e-10	2.33e-10	22.5389	-33.8194	0.272228
mmu-miR-3086-5p	uagauuguaggcccauuggaa	-	1e-10	16	1e-10	1e-10	39	1.86e-10	4.45e-10	5.63e-10	5.26e-10	90.7118	152.051	-33.8194	0.272228
mmu-miR-8112-3p	cucuccgccaccuccaccgcagc	-	1e-10	1e-10	5	1e-10	12	1.86e-10	4.45e-10	28.1736	5.26e-10	2.33e-10	28.1736	-33.8194	0.272228
mmu-miR-1247-3p	cgggaacgucgagacuggagc	hsa-miR-1292-5p	1e-10	1e-10	1e-10	8	1e-10	1.86e-10	4.45e-10	5.63e-10	42.0847	2.33e-10	42.0847	0.482048	0.505054
mmu-miR-693-3p	gcagcuuucagauguggcug	-	1e-10	1e-10	1e-10	8	1e-10	1.86e-10	4.45e-10	5.63e-10	42.0847	2.33e-10	42.0847	0.482048	0.505054
mmu-miR-539-3p	cauacaaggauaauuucuuuuu	hsa-miR-381-3p	1e-10	1e-10	1e-10	9	1e-10	1.86e-10	4.45e-10	5.63e-10	47.3452	2.33e-10	47.3452	33.5164	0.495025
mmu-miR-669f	aguugugugugcaugugcaugu	-	1e-10	1e-10	7	1e-10	1e-10	1.86e-10	4.45e-10	39.4431	5.26e-10	2.33e-10	39.4431	33.5164	0.495025
mmu-miR-539-5p	ggagaaauuauccuuggugugu	hsa-miR-539-5p	1e-10	1e-10	9	1e-10	19	1.86e-10	4.45e-10	50.7125	5.26e-10	2.33e-10	77.0009	33.471	0.495025
mmu-miR-369-5p	agaucgaccguguuauauucg	hsa-miR-369-5p	1e-10	1e-10	1e-10	1e-10	80	1.86e-10	4.45e-10	5.63e-10	5.26e-10	186.076	186.076	33.471	0.495025
mmu-miR-7a-5p	uggaagacuagugauuuuguuguu	hsa-miR-7-5p	1e-10	1e-10	24	1e-10	1e-10	1.86e-10	4.45e-10	135.233	5.26e-10	2.33e-10	135.233	33.471	0.495025
mmu-miR-3084-5p	uucugccagucuccuucagaca	hsa-miR-4727-5p	1e-10	1e-10	24	1e-10	1e-10	1.86e-10	4.45e-10	135.233	5.26e-10	2.33e-10	262.294	33.471	0.495025
mmu-miR-106a-5p	caaagugcuaacagugcagguag	hsa-miR-17-5p	1e-10	1e-10	25	1e-10	1e-10	1.86e-10	4.45e-10	140.868	5.26e-10	2.33e-10	149.631	33.471	0.495025
mmu-miR-377-3p	ugaaucacacaaaggcaacuuuu	rno-miR-377-3p	1e-10	1e-10	1e-10	37	1e-10	1.86e-10	4.45e-10	5.63e-10	194.642	2.33e-10	448.762	-33.5629	0.272228
mmu-miR-329-3p	aacacacccagcuaaccuuuuu	hsa-miR-362-3p	1e-10	1e-10	30	1e-10	1e-10	1.86e-10	4.45e-10	169.042	5.26e-10	2.33e-10	169.042	33.3719	0.495025
mmu-miR-503-3p	gaguauuguuuccacugccugg	-	1e-10	1e-10	30	1e-10	1e-10	1.86e-10	4.45e-10	169.042	5.26e-10	2.33e-10	169.042	33.3719	0.495025
mmu-miR-299a-5p	ugguuuaccgucccacauacau	hsa-miR-299-5p	1e-10	1e-10	61	1e-10	1e-10	1.86e-10	4.45e-10	343.718	5.26e-10	2.33e-10	343.718	-33.2999	0.272228
mmu-miR-350-3p	uucacaaagcccauacacuuuc	rno-miR-350	1e-10	1e-10	1e-10	124	1e-10	1.86e-10	4.45e-10	5.63e-10	652.312	2.33e-10	1287.61	-33.2999	0.272228
mmu-miR-337-3p	uucagcuccuauaugaugccu	rno-miR-337-3p	1e-10	1e-10	1e-10	129	1e-10	1.86e-10	4.45e-10	5.63e-10	678.615	2.33e-10	678.615	33.1945	0.495025
mmu-miR-200c-3p	uaauacugccggguaaugaugga	hsa-miR-200b-3p	1e-10	1e-10	167	1e-10	1e-10	1.86e-10	4.45e-10	940.999	5.26e-10	2.33e-10	954.143	33.1945	0.495025
mmu-miR-99b-5p	cacccguagaaccgaccuugc	hsa-miR-99a-5p	1e-10	1e-10	68985	68607	63342	1.86e-10	4.45e-10	5.63e-10	360913	2.33e-10	755580	33.1945	0.495025
mmu-miR-3099-3p	uaggcuagagagagguugggg	rno-miR-3099	1e-10	1e-10	1e-10	1e-10	8	1.86e-10	4.45e-10	5.63e-10	5.26e-10	2.33e-10	35.0511	-33.2345	0.272228
mmu-miR-3074-1-5p	gauaucagcucaguaggcaccg	hsa-miR-3074-3p	1e-10	1e-10	3	1e-10	1e-10	1.86e-10	4.45e-10	5.63e-10	5.26e-10	2.33e-10	30.6697	0.482048	0.505054
mmu-miR-3100-5p	uugggaacggggugucuuugg	ssc-miR-450b-3p	1e-10	1e-10	1e-10	1e-10	3	1.86e-10	4.45e-10	5.63e-10	5.26e-10	2.33e-10	17.5256	0.482048	0.505054
mmu-miR-344b-3p	cauuuagccaaagccugacugu	-	1e-10	1e-10	1e-10	1e-10	3	1.86e-10	4.45e-10	5.63e-10	5.26e-10	2.33e-10	8.76278	0.482048	0.505054
mmu-miR-532-5p	caugccuugaguguaggaccgu	hsa-miR-532-5p	1e-10	1e-10	1e-10	1e-10	1e-10	1.86e-10	4.45e-10	5.63e-10	5.26e-10	2.33e-10	9034.43	0.482048	0.505054
mmu-miR-708-5p	aaggagcuuacaaucuagcugg	hsa-miR-28-5p	1e-10	1e-10	1e-10	1e-10	1e-10	1.86e-10	4.45e-10	5.63e-10	5.26e-10	2.33e-10	271.646	-32.978	0.272228
mmu-miR-7654-5p	ggagucgcgcucccgcucgcgc	-	1e-10	1e-10	1e-10	1e-10	1e-10	1.86e-10	4.45e-10	5.63e-10	5.26e-10	2.33e-10	17.5256	-32.978	0.272228
mmu-miR-770-5p	agcaccacgugucugggccacg	rno-miR-770-5p	1e-10	1e-10	1e-10	1e-10	1e-10	1.86e-10	4.45e-10	5.63e-10	5.26e-10	2.33e-10	13.1442	-32.978	0.272228
mmu-miR-741-3p	ugagagaugccauucuauguaga	-	1e-10	1e-10	1e-10	1e-10	1e-10	1.86e-10	4.45e-10	5.63e-10	5.26e-10	2.33e-10	13.1442	32.7795	0.495025
mmu-miR-6955-5p	agggccucaggacucaggaggu	-	1e-10	1e-10	1e-10	1e-10	1e-10	1.86e-10	4.45e-10	5.63e-10	5.26e-10	2.33e-10	8.76278	32.7795	0.495025
mmu-miR-760-5p	cccucaggccaccagagcccgga	-	1e-10	1e-10	1e-10	1e-10	1e-10	1.86e-10	4.45e-10	5.63e-10	5.26e-10	2.33e-10	8.76278	32.7795	0.495025
mmu-miR-7689-3p	uuagagccagacugccuggguu	-	1e-10	1e-10	1e-10	1e-10	1e-10	1.86e-10	4.45e-10	5.63e-10	5.26e-10	2.33e-10	8.76278	32.7795	0.495025
mmu-miR-5132-5p	uggggugguggacucaggcuuc	hsa-miR-608	1e-10	1e-10	1e-10	1e-10	1e-10	1.86e-10	4.45e-10	5.63e-10	5.26e-10	2.33e-10	4.38139	32.7795	0.495025
mmu-miR-1930-5p	accuccauaguaccugcagcgu	-	1e-10	2	1e-10	2	5	1.86e-10	8.9067	5.63e-10	10.5212	11.6297	31.0576	32.7795	0.495025
mmu-miR-470-5p	uucuuggacuggcacuggugagu	-	1e-10	2	1e-10	1e-10	1e-10	1.86e-10	8.9067	5.63e-10	5.26e-10	2.33e-10	17.6695	32.7795	0.495025
mmu-miR-5113-5p	gacagaggaggagagagauccugu	-	1e-10	4	1e-10	6	29	1.86e-10	17.8134	5.63e-10	5.26e-10	67.4524	85.2658	32.7795	0.495025
mmu-miR-6922-3p	ucuguucugcucacccuucuca	hsa-miR-26b-3p	1e-10	2	1e-10	1e-10	1e-10	1.86e-10	8.9067	5.63e-10	5.26e-10	2.33e-10	8.9067	32.7795	0.495025
mmu-miR-18a-3p	acugcccuaagugcuccuucug	hsa-miR-18a-3p	1e-10	3	1e-10	1e-10	1e-10	1.86e-10	13.3601	5.63e-10	5.26e-10	2.33e-10	13.3601	-32.5629	0.272228
mmu-miR-1291-5p	auggcucuuacugaagacuagc	hsa-miR-8057	1e-10	3	1e-10	1e-10	1e-10	1.86e-10	13.3601	5.63e-10	5.26e-10	2.33e-10	13.3601	-32.5629	0.272228
mmu-miR-7025-3p	cagcacaacuccagcucacc	rno-miR-3590-3p	1e-10	3	1e-10	1e-10	1e-10	1.86e-10	13.3601	5.63e-10	5.26e-10	2.33e-10	13.3601	-32.5629	0.272228
mmu-miR-551b-3p	gcgacccauacuugguuucagu	hsa-miR-551a	1e-10	3	1e-10	1e-10	1e-10	1.86e-10	13.3601	5.63e-10	5.26e-10	2.33e-10	13.3601	-32.5629	0.272228
mmu-miR-3085-3p	ucuggcugcuauggcccccucc	hsa-miR-3064-5p	1e-10	3	1e-10	1e-10	1e-10	1.86e-10	13.3601	5.63e-10	5.26e-10	2.33e-10	13.3601	-32.5629	0.272228
mmu-miR-504-5p	gacccuggucugcacucuauc	-	1e-10	43	43	25	59	1.86e-10	191.494	242.293	5.26e-10	137.231	689.315	-32.5629	0.272228
mmu-miR-7226-3p	ugacacagccauucucugagca	-	1e-10	3	1e-10	1e-10	1e-10	1.86e-10	13.3601	5.63e-10	5.26e-10	2.33e-10	13.3601	32.1945	0.495025
mmu-miR-5615-5p	uugguuguuuucugagaca	-	1e-10	3	1e-10	1e-10	1e-10	1.86e-10	13.3601	5.63e-10	5.26e-10	2.33e-10	13.3601	32.1945	0.495025
mmu-miR-3105-3p	acugcuuaugagcuugcacu	-	1e-10	4	1e-10	1e-10	1e-10	1.86e-10	17.8134	5.63e-10	5.26e-10	2.33e-10	17.8134	32.1945	0.495025
mmu-miR-5107-5p	uugggcagaggaggcagggacaaca	-	1e-10	5	1e-10	1e-10	7	1.86e-10	22.2668	5.63e-10	5.26e-10	2.33e-10	22.2668	32.1945	0.495025
mmu-miR-448-3p	uugcauauguaggauguccca	hsa-miR-448	1e-10	5	1e-10	1e-10	1e-10	1.86e-10	22.2668	5.63e-10	5.26e-10	2.33e-10	22.2668	32.1945	0.495025
mmu-miR-325-3p	uuuauugagcaccuccuauca	rno-miR-325-3p	1e-10	11	1e-10	1e-10	1e-10	1.86e-10	48.9869	5.63e-10	5.26e-10	2.33e-10	48.9869	32.1945	0.495025
mmu-miR-145a-3p	auuccuggaaauacuguucuu	-	1e-10	741	1e-10	1e-10	2740	1.86e-10	3299.93	5.63e-10	5.26e-10	6373.09	9673.02	32.1945	0.495025
mmu-miR-6979-3p	uugugucugucuggcucccagu	-	1e-10	2	3	1e-10	3	1.86e-10	8.9067	16.9042	5.26e-10	2.33e-10	25.8109	32.1945	0.495025
mmu-miR-3059-5p	uuuccucucugccccauagggug	rno-miR-185-3p	1e-10	18	1e-10	1e-10	1e-10	1.86e-10	80.1603	5.63e-10	5.26e-10	2.33e-10	80.1603	32.1945	0.495025
mmu-miR-758-3p	uuugugaccugguccacuaac	hsa-miR-758-3p	1e-10	19	1e-10	1e-10	4	1.86e-10	84.6137	5.63e-10	5.26e-10	2.33e-10	84.6137	32.1945	0.495025
mmu-let-7j-5p	ugagguauuaguuugugcuguua	hsa-miR-202-3p	1e-10	3803	1e-10	1e-10	11888	1.86e-10	16936.1	5.63e-10	5.26e-10	27650.8	55093.5	0.482048	0.505054
mmu-miR-324-3p	ccacugccccaggugcugcug	hsa-miR-6890-3p	1e-10	24	1e-10	1e-10	1e-10	1.86e-10	106.88	5.63e-10	5.26e-10	2.33e-10	106.88	-31.978	0.272228
mmu-miR-185-3p	aggggcuggcuuuccucuggu	hsa-miR-185-3p	1e-10	28	1e-10	1e-10	1e-10	1.86e-10	124.694	5.63e-10	5.26e-10	2.33e-10	124.694	-31.978	0.272228
mmu-miR-212-3p	uaacagucuccagucacggcc	hsa-miR-212-3p	1e-10	44	1e-10	1e-10	1e-10	1.86e-10	195.947	5.63e-10	5.26e-10	2.33e-10	195.947	-31.978	0.272228
mmu-miR-652-5p	aauggcgccacuaggguug	hsa-miR-652-3p	1e-10	64	1e-10	1e-10	1e-10	1.86e-10	285.014	5.63e-10	5.26e-10	2.33e-10	285.014	-31.978	0.272228
mmu-miR-214-5p	ugccugucuacacuugcugugc	hsa-miR-214-5p	1e-10	90	1e-10	1e-10	1e-10	1.86e-10	400.802	5.63e-10	5.26e-10	2.33e-10	400.802	-31.978	0.272228
mmu-miR-409-3p	gaauguugcucggugaaccccu	hsa-miR-409-3p	1e-10	407	1e-10	1e-10	1e-10	1.86e-10	1812.51	5.63e-10	5.26e-10	2.33e-10	1812.51	31.1945	0.495025
