# Supplementary material for: miRNA Transcriptome of Hypertrophic Skeletal Muscle with Overexpressed Myostatin Propeptide
Source: Biomed Res Int. 2014 Jul 24;2014:328935. doi: 10.1155/2014/328935 (PMC4131533; doi:10.1155/2014/328935)
Supplement: Supplementary file 2 [file 328935.f2.xls]

## Sheet: Sheet1
	miR-16-2
5'-	caugcuuguuccacucuagcagcacguaaauauuggcguagugaaauaaauauuaaacac -3' exp
	....(((((.((((...((.((.((.......)))))))))).)))))........... reads mm
	...............cuagcagcacguaaauauuggcg...................... 2 0
	................uagcagcacguaaauauug......................... 3 0
	................uagcagcacguaaauauugA........................ 1 1
	................uagcagcacguaaauauugg........................ 3 0
	................uaCcagcacguaaauauuggc....................... 2 1
	................uagcagcacguaaauauuggG....................... 1 1
	................uagcagcacguaaaAauuggc....................... 4 1
	................uagcagcacguaaauauuggA....................... 7 1
	................uUgcagcacguaaauauuggc....................... 1 1
	................uaAcagcacguaaauauuggc....................... 2 1
	................uagcagcGcguaaauauuggc....................... 1 1
	................uagcagcacguaaauauugUc....................... 1 1
	................uagGagcacguaaauauuggc....................... 8 1
	................uagcagcacguaaauauuggc.......................2400 0
	................uagAagcacguaaauauuggc....................... 1 1
	................uagcagcacguaaauGuuggc....................... 1 1
	................uagcagcaUguaaauauuggc....................... 1 1
	................uagcagcacguaaauauuggcA......................176 1
	................uagcagcGcguaaauauuggcg...................... 2 1
	................uaAcagcacguaaauauuggcg...................... 9 1
	................uagcagcacguaaaAauuggcg...................... 6 1
	................uagcagcacguaaauauuggcg......................25604 0
	................uUgcagcacguaaauauuggcg...................... 1 1
	................uagcagcacguaaauauugCcg...................... 1 1
	................uagcagcacguaaauauugAcg...................... 2 1
	................uagcagcacgAaaauauuggcg...................... 2 1
	................uagcagcacguaaauauuggcC...................... 1 1
	................uagcagcacguaaauCuuggcg...................... 1 1
	................uagGagcacguaaauauuggcg...................... 90 1
	................uagcagcacguaaauauuggcgA..................... 87 1
	miR-133a-1
5'-	gcuaaagcugguaaaauggaaccaaaucgccucuucaauggauuugguccccuucaacca -3' exp
	((....)).(((..((.((.((((((((............)))))))).)).))..))). reads mm
	...aaagcugguaaaauggaacc..................................... 122 0 seq
	....aagcugguaaaauggaacc..................................... 30 0 seq
	....aagcugguaaaauggaacca.................................... 16 0 seq
	....aagcugguaaaauggaaccaa................................... 104 0 seq
	....aagcugguaaaauggaaccaaa.................................. 37 0 seq
	.....agcugguaaaauggaacc..................................... 544 0 seq
	.....agcugguaaaauggaacca.................................... 317 0 seq
	.....agcugguaaaauggaaccaa................................... 368 0 seq
	.....agcugguaaaauggaaccaaa.................................. 2409 0 seq
	.....agcGgguaaaauggaaccaaa.................................. 13 1 seq
	.....agcugguaaaauggaaccaaau................................. 40 0 seq
	.....agcugguaaaauggaaccaaauc................................ 585 0 seq
	.....agcugguaaaauggaaccaaaucgcc............................. 80 0 seq
	......gcugguaaaauggaaccaaa.................................. 78 0 seq
	......gcugguaaaauggaaccaaauc................................ 106 0 seq
	......gcugguaaaauggaaccaaaucgcc............................. 13 0 seq
	miR-188b-2
5'-	uugauggcugcacucaacauucauugcugucgguggguuugaaugucaaccaacucacug -3' exp
	.((((((.((((.((((.((((((((....)))))))))))).)).)).)))..)))... reads mm
	...............aacGuucauugcugucgg........................... 7 1 seq
	...............aacauucaAugcugucgg........................... 6 1 seq
	...............aaAauucauugcugucgg........................... 6 1 seq
	...............aacauucauugcugucgg........................... 1742 0 seq
	...............aacauucauugcugucggG.......................... 2 1 seq
	...............aacauucauugcugucggu.......................... 50 0 seq
	...............aacauucauugcugucggA.......................... 38 1 seq
	...............aacauucauugcugucgguA......................... 30 1 seq
	...............aacauucauugcugucggug......................... 322 0 seq
	...............aacauucauugcugucgUugg........................ 1 1 seq
	...............aacauucauugcugucggugg........................ 107 0 seq
	...............aacauucauugcugucggugA........................ 422 1 seq
	...............aacauucauugcugucgguggU....................... 8 1 seq
	...............aacGuucauugcugucgguggg....................... 31 1 seq
	...............aacauucauugcugucgguggg....................... 6296 0 seq
	...............aacauucauugcugucgguggA....................... 51 1 seq
	...............aaAauucauugcugucgguggg....................... 23 1 seq
	...............aacauucauugcugucggugggu...................... 612 0 seq
	...............aacauucauugcugucggugggA...................... 378 1 seq
	...............aacauucauugcugucgguggUu...................... 4 1 seq
	...............aacauucauugcuguAggugggu...................... 1 1 seq
	...............aacauucauugcugucggugggG...................... 92 1 seq
	...............aacauucauugcugucgguggguu..................... 130 0 seq
	...............aacauucauugcugucggugggAu..................... 2 1 seq
	...............aacauucauugcugucgguggguA..................... 36 1 seq
	...............aacauucUuugcugucgguggguu..................... 1 1 seq
	...............aacauucauugcugucgguggguuu.................... 49 0 seq
	................acauucauugcugucgguggg....................... 327 0 seq
	................acauucauugcugucggugggG...................... 5 1 seq
	................acauucauugcugucggugggu...................... 30 0 seq
	................acauucauugcugucggugggA...................... 16 1 seq
	................acauucauugcugucgguggguu..................... 21 0 seq
5'-	miR-199a-2
	uggaagcuucaggagauccugcuccgucgccccaguguucagacuaccuguucaggacaa -3' exp
	(((..((....((((......))))...)).))).(((((.(((.....)))..))))). reads mm
	..............................cccGguguucagacuacc............ 1 1 seq
	..............................cccaguguucagacuacc............ 62 0 seq
	..............................cccaguguucagacuaccug.......... 111 0 seq
	..............................cccGguguucagacuaccug.......... 1 1 seq
	..............................cccaguguucagacuaccugu......... 182 0 seq
	..............................cUcaguguucagacuaccugu......... 1 1 seq
	..............................cccaguguucagacuaccugA......... 4 1 seq
	..............................cccaguguucagacuaccuguu........ 75 0 seq
	..............................cccaguguucagacuaccuguA........ 11 1 seq
	..............................cccUguguucagacuaccuguuc....... 1 1 seq
	..............................cccGguguucagacuaccuguuc....... 3 1 seq
	..............................cccaguguucagaAuaccuguuc....... 1 1 seq
	..............................cccaguguucagacuaccuUuuc....... 2 1 seq
	..............................cccaguguucagacuaccuguuA....... 115 1 seq
	..............................Accaguguucagacuaccuguuc....... 1 1 seq
	..............................cccaguguucagacuaccuguuc....... 863 0 seq
	..............................cccaguguucagaGuaccuguuc....... 1 1 seq
	..............................cAcaguguucagacuaccuguuc....... 1 1 seq
	..............................cccaguguucUgacuaccuguuc....... 1 1 seq
	..............................ccAaguguucagacuaccuguuc....... 3 1 seq
	..............................cccaguguucGgacuaccuguuc....... 1 1 seq
	..............................cccaguguucagacuaccuguuca...... 30 0 seq
	..............................ccAaguguucagacuaccuguuca...... 1 1 seq
	..............................cccaguguucagacuaccuguucG...... 1 1 seq
	..............................cccaguguucagacuaccuguucaA..... 1 1 seq
5'-	miR-486
	cagccagcucugaucucgcccucccugagggguccuguacugagcugccccgagguccuu -3' exp
	....((((((..((...(((((......)))))...))...))))))............. reads mm
	............................gUgguccuguacugagcugccccgag...... 1 1 seq
	...............................Cuccuguacugagcugccccga....... 139 1 seq
	...............................guccuguacugagcugccccga....... 13 0 seq
	...............................Cuccuguacugagcugccccgag...... 614 1 seq
	................................uccuguacugagcugccc.......... 236 0 seq
	................................uccuguacugagcugcccc......... 714 0 seq
	................................uccuguacugagcugccccg........ 7622 0 seq
	................................uccGguacugagcugccccg........ 108 1 seq
	................................ucAuguacugagcugccccg........ 42 1 seq
	................................uccuguacugagcugccccgG....... 1139 1 seq
	................................uccGguacugagcugccccga....... 723 1 seq
	................................ucAuguacugagcugccccga....... 390 1 seq
	................................uccuguacugagcugccccga....... 98430 0 seq
	................................uccuguacugagcugccccgaC...... 974 1 seq
	................................uccuguacugagcugccccgGg...... 624 1 seq
	................................uccuguacugagcugcccUgag...... 83 1 seq
	................................uccuguacugagcugccccgCg...... 25 1 seq
	................................uccuguacugagcugAcccgag...... 129 1 seq
	................................uccuguacugagcugcAccgag...... 60 1 seq
	................................uccugCacugagcugccccgag...... 79 1 seq
	................................ucAuguacugagcugccccgag...... 2018 1 seq
	................................ucGuguacugagcugccccgag...... 186 1 seq
	................................uccuguacugagcAgccccgag...... 124 1 seq
	................................uccuguacugaCcugccccgag...... 30 1 seq
	................................uAcuguacugagcugccccgag...... 116 1 seq
	................................uccGguacugagcugccccgag...... 3561 1 seq
	................................uccuguacugagcugccccgaU...... 596 1 seq
	................................uccuguacugagcugccUcgag...... 55 1 seq
	................................uccuguacugagcCgccccgag...... 79 1 seq
	................................uccuguacugagcugccccgaA...... 4421 1 seq
	................................uccuguacugagcuCccccgag...... 150 1 seq
	................................uccuguacugagcugccccgag...... 507280 0 seq
	................................uccuguacugagcugccccgagA..... 53390 1 seq
	................................uccuguacugagcugccccgagg..... 2228 0 seq
	................................uccuguacugagcugccccgagU..... 8278 1 seq
	................................uccuguacugagcugccccgaggu.... 191 0 seq
	................................uccuguacugagcugccccgagAu.... 556 1 seq
	................................uccuguacugagcugccccgaggA.... 73 1 seq
	................................uccuguacugagcugccccgagUu.... 4893 1 seq
	................................uccuguacugagcugccccgagguA... 129 1 seq
	................................uccuguacugagcugccccgagguU... 128 1 seq
	..................................cuguacugagcugccccgag...... 374 0 seq
	..................................cuguacugagcugccccgagg..... 1040 0 seq
	..................................cuguacugagcugccccgaggu.... 194 0 seq
	..................................cuguacugagcugccccgagguU... 163 1 seq
	..................................cuguacugagcugccccgagguA... 274 1 seq
	mmu-miR-26b
5'-	ugcccgggacccaguucaaguaauucaggauagguuguggugcugaccagccuguucucc mm
	..............uucaagAaauucaggauaggu......................... 8 1 seq
	..............uucUaguaauucaggauaggu......................... 2 1 seq
	..............uucaaguaauuUaggauaggu......................... 8 1 seq
	..............uucaaUuaauucaggauaggu......................... 3 1 seq
	..............uuUaaguaauucaggauaggu......................... 2 1 seq
	..............uucaaguaauucaAgauaggu......................... 5 1 seq
	..............uucaaguaauucaggauaggC......................... 269 1 seq
	..............uucaaguaGuucaggauaggu......................... 2 1 seq
	..............uucaaguaauucaggaCaggu......................... 2 1 seq
	..............uucaagCaauucaggauaggu......................... 5 1 seq
	..............Gucaaguaauucaggauaggu......................... 2 1 seq
	..............uucaaguaauucaggauaggu......................... 11195 0 seq
	..............Aucaaguaauucaggauaggu......................... 3 1 seq
	..............uucaGguaauucaggauaggu......................... 3 1 seq
	..............uucaaguaauucaggauaggG......................... 13 1 seq
	..............uucaaguaauuAaggauaggu......................... 2 1 seq
	..............uucaaAuaauucaggauaggu......................... 2 1 seq
	..............uuGaaguaauucaggauaggu......................... 6 1 seq
	..............uucaagGaauucaggauaggu......................... 4 1 seq
	..............uuAaaguaauucaggauaggu......................... 42 1 seq
	..............uucaaguaauCcaggauaggu......................... 57 1 seq
	..............uucaaguaaCucaggauaggu......................... 1 1 seq
	..............uucaaguaauucaggauaAgu......................... 2 1 seq
	..............uucGaguaauucaggauaggu......................... 46 1 seq
	..............uuAaaguaauucaggauagguu........................ 7 1 seq
	..............uucaaguaauCcaggauagguu........................ 8 1 seq
	..............uucaaguaauucaggauaggCu........................ 12 1 seq
	..............uucaaguaauucaggauagguA........................ 528 1 seq
	..............uucaaguaauucaggauagguC........................ 3 1 seq
	..............uucaaguaauucaggauagguu........................ 917 0 seq
	..............uGcaaguaauucaggauagguu........................ 1 1 seq
	..............uucaaguaauucaggauagguug....................... 23 0 seq
	..............uucaaguaauucaggauagguuC....................... 29 1 seq
	..............uucaaguaauucaggauagguuU....................... 29 1 seq
	..............uucaaguaauucaggauagguAg....................... 8 1 seq
	..............uucaaguaauucaggauagguuA....................... 929 1 seq
	..............uucaaguaauucaggauagguugA...................... 3 1 seq
	...............ucaaguaauucaggauaggu......................... 3 0 seq
	...............ucaaguaauucaggauaggC......................... 2 1 seq
