# Supplementary material for: miRNA Transcriptome of Hypertrophic Skeletal Muscle with Overexpressed Myostatin Propeptide
Source: Biomed Res Int. 2014 Jul 24;2014:328935. doi: 10.1155/2014/328935 (PMC4131533; doi:10.1155/2014/328935)
Supplement: Supplementary file 3 [file 328935.f3.xls]

## Sheet: Sheet1
	consensus.mature.sequence	mature.read.count.CN148	mature.read.count.CN150	mature.read.count.TN126	mature.read.count.TN135	mature.read.count.TN329
NMmu1	aucucgcuggggccucca	208	169	0	0	601
NMmu10	guucuuaguugguggagc	0	13	0	0	0
NMmu11	ucaaggagcucacagucuag	0	15	0	0	0
NMmu12	ugguggcgcgcgccuguaguccc	0	13	0	0	0
NMmu13	cagcagaggaaauccagacgggu	0	0	46	80	0
NMmu14	ugauuggaagacacucugcaaca	0	0	159	129	0
NMmu15	ugauuggaagacacucugcaau	0	0	29	23	0
NMmu16	aggauuugaccucuugugacagga	9	0	13	0	0
NMmu17	aucagaacaaccugaccugccu	0	0	0	10	0
NMmu18	ggagggaacgcagucugagugga	0	0	0	56	0
NMmu19	ugaccuaucccugcaccccagu	0	0	0	47	0
NMmu2	accgaucccggguuagucucc	0	10	0	0	8
NMmu20	cccauggagcuguaggagccg	42	0	0	0	0
NMmu21	cucuauaugaaauggcuggacagua	18	0	0	0	0
NMmu22	uucagggauaaauggagucacag	0	0	0	0	0
NMmu23	uuggcugagggaaaugacugaau	0	0	0	0	0
NMmu24	ucgccacccccaacccccagg	0	0	11	9	0
NMmu25	uaaugguuccuuuguaaaa	0	0	3728	0	0
NMmu26	uggccuaaccgaacccuguuc	0	0	13	0	0
NMmu27	ucaucuaguacucuacaaacac	0	0	0	4	7
NMmu28	aagccgggccuagugacucucu	0	0	0	3	0
NMmu29	aucucgguggaaccucca	0	0	0	386	0
NMmu3	gugauggggaucggggau	0	10	0	0	14
NMmu30	cagcuggcugcucuuccagaggacc	0	0	0	14	0
NMmu31	ugugcucuucugcuccuucucc	0	0	0	5	0
NMmu32	uugcgucccugaguuuccuaga	0	0	0	9	0
NMmu33	aagccgggccuagugacucuc	7	0	0	0	8
NMmu34	aaucccgaacgagccccca	157	0	0	0	484
NMmu35	cagcuguuacucaagggaac	68	0	0	0	210
NMmu36	gauucggcugaucuggcuggc	457	0	0	0	515
NMmu37	ucgccacccccaacccccag	8	0	0	0	15
NMmu38	ugaccuaucccugcaccccag	49	0	0	0	128
NMmu39	ugauuggaagacacucugcaa	27	0	0	0	34
NMmu4	acacagcucugggucaugg	0	192	0	0	0
NMmu40	aaaaauaacaauacaggac	0	0	0	0	261
NMmu41	aacguggcccggcuggacggcucc	0	0	0	0	8
NMmu42	acgggugugcucagagcagggggcc	0	0	0	0	14
NMmu43	agaauagacuauaguuuggc	0	0	0	0	2
NMmu44	aggauuugaccucuugugacagg	0	0	0	0	21
NMmu45	aggggaaucugacugucuaa	0	0	0	0	19
NMmu46	cagcuggcugcucuuccagaggac	0	0	0	0	34
NMmu47	cccuuguccaugcugcac	0	0	0	0	2
NMmu48	cuccacacugugccugaccug	0	0	0	0	5
NMmu49	gaggaucugguucuguagc	0	0	0	0	11
NMmu5	caccaggaguggagccugc	0	18	0	0	0
NMmu50	gauaaauggagucacagaca	0	0	0	0	40
NMmu51	ggaggggguggggggaaa	0	0	0	0	10
NMmu52	uacgguccggcgccgcgcggg	0	0	0	0	3
NMmu53	ucagcugccgugguucugggc	0	0	0	0	10
NMmu54	ucugaagcagguuaauuccuc	0	0	0	0	9
NMmu55	ucugcuagcgcauaacuggggc	0	0	0	0	76
NMmu56	ucuuaucccuucuuuaucucag	0	0	0	0	9
NMmu57	ugauccacaguugucuuaugac	0	0	0	0	5
NMmu58	ugauuggaagacacucugcaac	0	0	0	0	229
NMmu59	uggccuaaccgaacccuguucc	0	0	0	0	9
NMmu6	cucguccucucccucccucc	0	24	0	0	0
NMmu60	ugucucuacaacucugccac	0	0	0	0	30
NMmu61	ugugcucuucugcuccuucuc	0	0	0	0	9
NMmu62	uucaaaucccagcaaccaca	0	0	0	0	16
NMmu63	uucguacggagagagagagaa	0	0	0	0	16
NMmu64	uugcgucccugaguuuccuag	0	0	0	0	42
NMmu65	uuguagaguacuagaugauacag	0	0	0	0	7
NMmu66	uuugcugcauuugacaggcacag	0	0	0	0	4
NMmu67	guccuuggucguccugga	8	0	0	0	0
NMmu68	gucucucguacauggucuaga	7	0	0	0	0
NMmu69	uaugucacugggcauuggcuuuga	12	0	0	0	0
NMmu7	cuggggcuaagggguaaaggag	0	2	0	0	0
NMmu8	gagcugcagcugcuggcc	0	93	0	0	0
NMmu9	gagcuguagccacuggac	0	71	0	0	0
