# Supplementary material for: miRNA Transcriptome of Hypertrophic Skeletal Muscle with Overexpressed Myostatin Propeptide
Source: Biomed Res Int. 2014 Jul 24;2014:328935. doi: 10.1155/2014/328935 (PMC4131533; doi:10.1155/2014/328935)
Supplement: Supplementary file 4 [file 328935.f4.xls]

## Sheet: Sheet1
mmu_miRNA	miRBase miRNA with the sam seed	read CN148	read CN 150	read TN 126	read TN 135	read TN 329	CN148	CN150	TN126	TN135	TN329
mmu-miR-133a-3p	hsa-miR-133a-3p	716877	1143874	1004715	1049011	2559079	2.13215e+06	3.19251e+06	5.66129e+06	5.51841e+06	5.95227e+06
mmu-miR-378a-3p	hsa-miR-378a-3p	201482	427775	356711	417747	963117	797360	897270	2.00997e+06	2.19759e+06	2.24016e+06
mmu-miR-26a-5p	hsa-miR-26a-5p	151950	265020	184254	263216	580434	493990	676687	1.03822e+06	1.38467e+06	1.35006e+06
mmu-miR-27b-3p	hsa-miR-27a-3p	85527	190947	151307	174403	375692	355920	380882	852573	917461	873838
mmu-miR-30d-5p	hsa-miR-30a-5p	36990	71324	53116	69360	151007	132946	164729	299294	364874	351234
mmu-miR-30e-5p	hsa-miR-30a-5p	22850	46295	49869	64934	106949	86292.5	101759	280998	341591	248757
mmu-miR-30c-5p	hsa-miR-30a-5p	18170	37487	25658	36686	79218	69874.7	80917.4	144576	192990	184257
mmu-miR-101a-3p	hsa-miR-101-3p	12254	27883	32687	43902	70651	53605.9	59256.3	172896	152662	137589
mmu-miR-16-5p	hsa-miR-15a-5p	13306	28759	30684	29020	59154	51973.1	54571.4	184182	230950	164330
mmu-miR-21a-5p	hsa-miR-21-5p	13328	25762	31527	22657	51740	48019.6	59354.3	177646	119189	120344
mmu-let-7a-5p	hsa-let-7a-5p	14527	22645	19001	18235	51268	42209.6	64693.8	107065	95926.7	119246
mmu-miR-26b-5p	hsa-miR-26a-5p	7630	18498	20838	26573	39953	41072.6	47811.2	95277.5	72927.5	96317.3
mmu-miR-125a-5p	hsa-miR-125b-5p	10736	22035	16909	13863	41410	34479.7	33979.1	117416	139789	92928.4
mmu-miR-199a-3p	hsa-miR-199a-3p	9097	9547	14307	13552	25039	32190.8	34549.1	81461.2	91734	87188
mmu-miR-378d-5p	hsa-miR-3176	7758	17270	14457	17438	37485	27199.1	35533.3	62731.4	57203.6	76851.5
mmu-let-7g-5p	hsa-let-7a-5p	7979	14592	11133	10874	33041	25679.9	28617.2	55699.2	62322.1	63696
mmu-miR-29a-3p	hsa-miR-29a-3p	6816	12690	11363	13280	29940	23653.8	30354	64027.4	69860.5	69638.8
mmu-miR-151-5p	hsa-miR-151a-5p	6426	13777	9885	11847	27385	17795.3	40512.1	80616	71291.4	58239.3
mmu-miR-186-5p	hsa-miR-186-5p	5045	7600	6868	9321	16498	14166.2	22467.2	38699.3	49033.9	38373.4
mmu-miR-30b-5p	hsa-miR-30a-5p	2208	6644	6869	9385	11859	12384.2	9833	38704.9	49370.6	27583.4
mmu-miR-23b-3p	hsa-miR-23a-3p	2036	4899	5410	5394	9048	11129.8	15462	34112.6	23362.2	27490.3
mmu-miR-25-3p	hsa-miR-25-3p	3472	5971	6054	4441	11819	9131.59	9067.02	30483.9	28375.6	21045.1
mmu-miR-103-5p	hsa-miR-103a-3p	2498	4648	4780	4388	8923	8663.74	11124.5	26934	23083.4	20754.4
mmu-miR-29c-3p	hsa-miR-29a-3p	1731	3086	3000	5514	8829	5752.21	7708.75	16904.2	29006.9	20535.8
mmu-miR-381-3p	hsa-miR-381-3p	1467	1149	1883	2775	5146	3927.39	5624.58	9426.89	9174.46	11539
mmu-miR-136-3p	hsa-miR-136-3p	1147	1482	1937	2336	4530	3616.1	5032.29	14729.2	15750.2	10376
mmu-miR-148b-3p	hsa-miR-148a-3p	1130	1940	2614	2994	4461	3228.4	3959.03	13624.8	11063	9410.77
mmu-miR-98-5p	hsa-let-7a-5p	1263	2107	1673	1744	4961	3097.92	3745.27	7533.63	6538.9	7580.25
mmu-miR-340-5p	hsa-miR-340-5p	889	1732	2418	2103	4046	2762.41	5107.99	10914.5	12288.7	10536.5
mmu-miR-107-3p	hsa-miR-103a-3p	841	1662	1337	1243	3259	2741.9	3010.47	7240.62	7007.1	7270.9
mmu-miR-196b-5p	hsa-miR-196a-5p	537	1267	1317	1793	2690	2361.65	2391.45	7420.93	9432.23	6256.79
mmu-miR-130a-3p	hsa-miR-130a-3p	614	1126	972	922	2518	2141.7	6533.07	10610.2	14598.1	11969.3
mmu-miR-15a-5p	hsa-miR-15a-5p	676	1471	1285	1332	3126	2119.34	2476.06	5245.93	4192.68	5545.05
mmu-miR-497-5p	hsa-miR-15a-5p	474	789	765	702	1685	2098.83	2734.36	5476.95	4850.26	5856.73
mmu-miR-320-3p	hsa-miR-320a	498	1062	729	781	2029	1979.54	2217.77	4107.71	4108.52	4719.34
mmu-miR-425-5p	hsa-miR-425-5p	556	1137	931	797	2384	1470.67	2110.89	4310.56	3692.93	3919.22
mmu-miR-301a-3p	hsa-miR-130a-3p	376	717	997	887	1705	1336.47	1674.46	5617.82	4666.14	3965.73
mmu-miR-410-3p	hsa-miR-410-3p	511	500	698	738	1581	1263.77	1260.3	3679.47	3650.84	3177.24
mmu-miR-7068-3p	hsa-miR-3620-3p	283	678	653	694	1366	993.497	1251.39	3431.55	4424.15	2605.06
mmu-miR-208b-3p	hsa-miR-208a-3p	9	0	561	838	1384	931.986	2275.66	3933.04	3882.31	3677.32
mmu-miR-361-5p	hsa-miR-361-5p	281	533	609	841	1120	628.158	4.45e-10	2225.72	2183.14	2384.09
mmu-miR-300-3p	rno-miR-300-3p	0	337	395	415	1025	473.449	556.669	1639.7	1862.25	1476.97
mmu-miR-29b-1-3p	hsa-miR-29a-3p	122	207	449	463	811	385.842	543.309	2529.99	2435.65	1886.34
mmu-miR-3068	-	125	254	291	354	635	218.085	258.294	743.783	562.882	479.144
mmu-miR-499-5p	hsa-miR-499a-5p	4	46	179	303	339	193.853	138.054	597.281	636.531	474.493
mmu-miR-409-5p	hsa-miR-409-5p	0	98	237	216	288	182.669	4.45e-10	1335.43	1136.29	669.872
mmu-miR-210-3p	hsa-miR-210-3p	58	117	132	107	206	147.254	160.321	247.928	215.684	288.417
mmu-miR-542-3p	hsa-miR-542-3p	40	56	98	74	151	128.614	124.694	687.436	610.228	602.419
mmu-miR-653-5p	rno-miR-653-5p	31	104	106	121	204	108.11	146.961	208.485	257.769	239.572
mmu-miR-582-3p	rno-miR-582-3p	28	69	122	116	259	104.382	178.134	552.203	389.283	351.218
mmu-miR-362-3p	hsa-miR-362-3p	18	35	86	64	119	91.3346	120.24	174.676	163.078	165.142
mmu-miR-376b-5p	rno-miR-376c-5p	26	44	57	94	124	85.7427	17.8134	1008.62	1593.96	788.495
mmu-miR-1947-5p	-	36	79	44	41	124	82.0147	115.787	321.179	494.495	288.417
mmu-miR-1191b-5p	-	33	58	37	49	103	42.8713	13.3601	157.772	126.254	95.3637
mmu-miR-615-3p	hsa-miR-615-3p	27	49	31	31	71	29.8235	57.8936	95.7903	89.4299	125.601
mmu-miR-190b-5p	hsa-miR-190a-5p	3	23	28	24	41	1.86e-10	40.0802	3161.08	4408.37	3219.11
mmu-miR-493-5p	hsa-miR-493-5p	13	16	17	17	54	1.86e-10	80.1603	484.586	336.677	276.787
